# Supplementary material for: Development and psychometric validation of measures to assess the impact of phenylketonuria and its dietary treatment on patients’ and parents’ quality of life: the phenylketonuria – quality of life (PKU-QOL) questionnaires
Source: PubMed Central journal article supplement (PMC4449597; doi:10.1186/s13023-015-0261-6), 2015-05-10
Supplement: 13023_2015_261_MOESM1_ESM.pdf [file 13023_2015_261_MOESM1_ESM.pdf]

## Additional file 1

### Multitrait analysis of the Child PKU-QOL

**Table 1-1 - Item convergent and discriminant criteria of the in 'PKU in general' module in the child evaluable population (n=92)**

| Domains                 | # items | Range of item-scale correlations | % of items meeting convergent criterion <sup>a</sup> | % of items meeting discriminant criterion <sup>b</sup> |
|-------------------------|---------|----------------------------------|------------------------------------------------------|--------------------------------------------------------|
| Emotional impact of PKU | 3       | 0.16–0.40                        | 33%                                                  | 67%                                                    |
| Practical impact of PKU | 2       | 0.32–0.32                        | 0%                                                   | 50%                                                    |
| Social impact of PKU    | 3       | 0.35–0.41                        | 33%                                                  | 67%                                                    |
| Anxiety – blood test    | 2       | 0.25–0.25                        | 0%                                                   | 100%                                                   |

PKU: phenylketonuria.

<sup>a</sup>Item Convergent criterion met if item-scale correlation greater than 0.4.

<sup>b</sup>Item Discriminant validity criterion met if the correlation of an item with its own scale is greater than the correlation of this item with all the other scales.

**Table 1-2 - Item convergent and discriminant criteria of 'Supplement administration' module in the child evaluable population (n=92)**

| Domains                      | # items | Range of item-scale correlations | % of items meeting convergent criterion <sup>a</sup> | % of items meeting discriminant criterion <sup>b</sup> |
|------------------------------|---------|----------------------------------|------------------------------------------------------|--------------------------------------------------------|
| Adherence to supplements     | 2       | 0.23–0.23                        | 0%                                                   | 50%                                                    |
| Social impact of supplements | 2       | 0.29–0.29                        | 0%                                                   | 50%                                                    |

<sup>a</sup>Item Convergent criterion met if item-scale correlation greater than 0.4.

<sup>b</sup>Item Discriminant validity criterion met if the correlation of an item with its own scale is greater than the correlation of this item with all the other scales.

**Table 1-3 - Item convergent and discriminant criteria of the 'Dietary protein restriction' module in the child evaluable population (n=92)**

| Domains                                      | # items | Range of item-scale correlations | % of items meeting convergent criterion <sup>a</sup> | % of items meeting discriminant criterion <sup>b</sup> |
|----------------------------------------------|---------|----------------------------------|------------------------------------------------------|--------------------------------------------------------|
| Food temptations                             | 2       | 0.47, 0.47                       | 100%                                                 | 0%                                                     |
| Adherence to dietary protein restriction     | 2       | 0.30, 0.30                       | 0%                                                   | 50%                                                    |
| Social impact of dietary protein restriction | 5       | 0.31, 0.65                       | 80%                                                  | 60%                                                    |

<sup>a</sup>Item Convergent criterion met if item-scale correlation greater than 0.4.

<sup>b</sup>Item Discriminant validity criterion met if the correlation of an item with its own scale is greater than the correlation of this item with all the other scales..

## Multitrait analysis of the Ado PKU-QOL questionnaire

**Table 1-4 - Item convergent and discriminant criteria of the 'PKU in General' module in the adolescent evaluable population (n=110)**

| Domains                 | # items | Range of item-scale correlations | % of items meeting convergent criterion <sup>a</sup> | % of items meeting discriminant criterion <sup>b</sup> |
|-------------------------|---------|----------------------------------|------------------------------------------------------|--------------------------------------------------------|
| Emotional impact of PKU | 5       | 0.41, 0.60                       | 100%                                                 | 60%                                                    |
| Practical impact of PKU | 3       | 0.24, 0.52                       | 33%                                                  | 0%                                                     |
| Social impact of PKU    | 3       | -0.11, 0.26                      | 0%                                                   | 33%                                                    |
| Anxiety – blood test    | 2       | 0.60, 0.60                       | 100%                                                 | 100%                                                   |

PKU: phenylketonuria.

<sup>a</sup>Item Convergent criterion met if item-scale correlation greater than 0.4.

<sup>b</sup>Item Discriminant validity criterion met if the correlation of an item with its own scale is greater than the correlation of this item with all the other scales.

**Table 1-5 - Item convergent and discriminant criteria of the 'Supplement administration' module in the adolescent evaluable population (n=110)**

| Domains                         | # items | Range of item-scale correlations | % of items meeting convergent criterion <sup>a</sup> | % of items meeting discriminant criterion <sup>b</sup> |
|---------------------------------|---------|----------------------------------|------------------------------------------------------|--------------------------------------------------------|
| Adherence to supplements        | 4       | 0.40–0.60                        | 75%                                                  | 100%                                                   |
| Practical impact of supplements | 4       | 0.56–0.65                        | 100%                                                 | 100%                                                   |

<sup>a</sup>Item Convergent criterion met if item-scale correlation greater than 0.4.

<sup>b</sup>Item Discriminant validity criterion met if the correlation of an item with its own scale is greater than the correlation of this item with all the other scales.

**Table 1-6 - Item convergent and discriminant criteria of the 'Dietary protein restriction' module in the adolescent evaluable population (n=110)**

| Domains                                         | # items | Range of item-scale correlations | % of items meeting convergent criterion <sup>a</sup> | % of items meeting discriminant criterion <sup>b</sup> |
|-------------------------------------------------|---------|----------------------------------|------------------------------------------------------|--------------------------------------------------------|
| Food temptations                                | 2       | 0.58–0.58                        | 100%                                                 | 100%                                                   |
| Adherence to dietary protein restriction        | 4       | 0.30–0.46                        | 75%                                                  | 50%                                                    |
| Practical impact of dietary protein restriction | 7       | 0.12–0.59                        | 57%                                                  | 57%                                                    |
| Social impact of dietary protein restriction    | 5       | 0.51–0.86                        | 100%                                                 | 100%                                                   |

<sup>a</sup>Item Convergent criterion met if item-scale correlation greater than 0.4.

<sup>b</sup>Item Discriminant validity criterion met if the correlation of an item with its own scale is greater than the correlation of this item with all the other scales.

## Multitrait analysis of the Adult PKU-QOL questionnaire

**Table 1-7 - Item convergent and discriminant criteria of the 'PKU in general' module in the adult evaluable population (n=104)**

| Domains                 | # items | Range of item-scale correlations | % of items meeting convergent criterion <sup>a</sup> | % of items meeting discriminant criterion <sup>b</sup> |
|-------------------------|---------|----------------------------------|------------------------------------------------------|--------------------------------------------------------|
| Emotional impact of PKU | 5       | 0.42–0.58                        | 100%                                                 | 40%                                                    |
| Practical impact of PKU | 4       | 0.31–0.39                        | 0%                                                   | 75%                                                    |
| Social impact of PKU    | 4       | 0.37–0.46                        | 75%                                                  | 75%                                                    |
| Anxiety – blood test    | 2       | 0.41–0.41                        | 100%                                                 | 50%                                                    |

PKU: phenylketonuria.

<sup>a</sup>Item Convergent criterion met if item-scale correlation greater than 0.4.

<sup>b</sup>Item Discriminant validity criterion met if the correlation of an item with its own scale is greater than the correlation of this item with all the other scales.

**Table 1-8 - Item convergent and discriminant criteria of the 'Supplement administration' module in the adult evaluable population (n=104)**

| Domains                         | # items | Range of item-scale correlations | % of items meeting convergent criterion <sup>a</sup> | % of items meeting discriminant criterion <sup>b</sup> |
|---------------------------------|---------|----------------------------------|------------------------------------------------------|--------------------------------------------------------|
| Adherence to supplements        | 3       | 0.47–0.57                        | 100%                                                 | 100%                                                   |
| Practical impact of supplements | 4       | 0.33–0.55                        | 75%                                                  | 75%                                                    |

<sup>a</sup>Item Convergent criterion met if item-scale correlation greater than 0.4.

<sup>b</sup>Item Discriminant validity criterion met if the correlation of an item with its own scale is greater than the correlation of this item with all the other scales.

**Table 1-9 - Item convergent and discriminant criteria of the 'Dietary protein restriction' module in the adult evaluable population (n=104)**

| Domains                                         | # items | Range of item-scale correlations | % of items meeting convergent criterion <sup>a</sup> | % of items meeting discriminant criterion <sup>b</sup> |
|-------------------------------------------------|---------|----------------------------------|------------------------------------------------------|--------------------------------------------------------|
| Food temptations                                | 2       | 0.67–0.67                        | 100%                                                 | 100%                                                   |
| Adherence to dietary protein restriction        | 5       | 0.53–0.80                        | 100%                                                 | 100%                                                   |
| Practical impact of dietary protein restriction | 7       | 0.31–0.66                        | 86%                                                  | 57%                                                    |
| Social impact of dietary protein restriction    | 6       | 0.42–0.65                        | 100%                                                 | 67%                                                    |

<sup>a</sup>Item Convergent criterion met if item-scale correlation greater than 0.4.

<sup>b</sup>Item Discriminant validity criterion met if the correlation of an item with its own scale is greater than the correlation of this item with all the other scales.

## Multitrait analysis of the Parent PKU-QOL questionnaire

**Table 1-10 - Item convergent and discriminant criteria of the 'PKU in general' module in the parent evaluable population (n=253)**

| Domains                        | # items | Range of item-scale correlations | % of items meeting convergent criterion <sup>a</sup> | % of items meeting discriminant criterion <sup>b</sup> |
|--------------------------------|---------|----------------------------------|------------------------------------------------------|--------------------------------------------------------|
| Emotional impact of PKU        | 4       | 0.34–0.54                        | 50%                                                  | 50%                                                    |
| Practical impact of PKU        | 6       | 0.25–0.59                        | 83%                                                  | 83%                                                    |
| Social impact of PKU           | 5       | 0.31–0.49                        | 80%                                                  | 60%                                                    |
| Anxiety – blood test           | 2       | 0.54–0.54                        | 100%                                                 | 0%                                                     |
| Impact of anxiety – blood test | 2       | 0.64–0.64                        | 100%                                                 | 0%                                                     |

PKU: phenylketonuria.

<sup>a</sup>Item Convergent criterion met if item-scale correlation greater than 0.4.

<sup>b</sup>Item Discriminant validity criterion met if the correlation of an item with its own scale is greater than the correlation of this item with all the other scales.

**Table 1-11 - Item convergent and discriminant criteria of 'Dietary protein restriction' module in the parent evaluable population (n=253)**

| Domains                                         | # items | Range of item-scale correlations | % of items meeting convergent criterion <sup>a</sup> | % of items meeting discriminant criterion <sup>b</sup> |
|-------------------------------------------------|---------|----------------------------------|------------------------------------------------------|--------------------------------------------------------|
| Practical impact of dietary protein restriction | 7       | 0.47–0.68                        | 100%                                                 | 100%                                                   |
| Management of dietary protein restriction       | 6       | 0.56–0.68                        | 100%                                                 | 100%                                                   |

<sup>a</sup>Item Convergent criterion met if item-scale correlation greater than 0.4.

<sup>b</sup>Item Discriminant validity criterion met if the correlation of an item with its own scale is greater than the correlation of this item with all the other scales.
