# Supplementary material for: Development and psychometric validation of measures to assess the impact of phenylketonuria and its dietary treatment on patients’ and parents’ quality of life: the phenylketonuria – quality of life (PKU-QOL) questionnaires
Source: PubMed Central journal article supplement (PMC4449597; doi:10.1186/s13023-015-0261-6), 2015-05-10
Supplement: 13023_2015_261_MOESM2_ESM.pdf [file 13023_2015_261_MOESM2_ESM.pdf]

## Additional file 2

### Clinical validity of the Child PKU-QOL questionnaire

**Table 2-1 - Clinical validity of the Child PKU-QOL Questionnaire: comparison of PKU-QOL scores according to patient overall health status as rated by the clinician in the child evaluable population (n=92)**

Scores of 0 indicate no impact (or no symptom for symptom scores), scores of 25 indicate a mild impact (or rare symptoms), scores of 50 indicate a moderate impact (or occasional symptoms), scores of 75 indicate major impact (or frequent symptom), scores of 100 indicate extremely severe impact (or very frequent symptoms)

|                                |                | Overall assessment of health status by the clinician <sup>a</sup> |                  |                     |                     | p-value<br>(Kruskal-Wallis) |
|--------------------------------|----------------|-------------------------------------------------------------------|------------------|---------------------|---------------------|-----------------------------|
|                                |                | Fair<br>(n=2)                                                     | Good<br>(n=19)   | Very good<br>(n=41) | Excellent<br>(n=28) |                             |
| <b>Headaches</b>               | n (missing)    | 2 (0)                                                             | 18 (1)           | 40 (1)              | 26 (2)              | 0.8285                      |
|                                | Median (Q1–Q3) | 12.5 (0.0–25.0)                                                   | 25.0 (0.0–25.0)  | 0.0 (0.0–25.0)      | 0.0 (0.0–50.0)      |                             |
| <b>Stomach aches</b>           | n (missing)    | 2 (0)                                                             | 18 (1)           | 40 (1)              | 26 (2)              | 0.5176                      |
|                                | Median (Q1–Q3) | 50.0 (0.0–100.0)                                                  | 0.0 (0.0–25.0)   | 0.0 (0.0–25.0)      | 0.0 (0.0–25.0)      |                             |
| <b>Tiredness</b>               | n (missing)    | 2 (0)                                                             | 18 (1)           | 40 (1)              | 26 (2)              | 0.3815                      |
|                                | Median (Q1–Q3) | 62.5 (25.0–100.0)                                                 | 50.0 (25.0–50.0) | 25.0 (0.0–50.0)     | 50.0 (25.0–50.0)    |                             |
| <b>Irritability</b>            | n (missing)    | 2 (0)                                                             | 18 (1)           | 40 (1)              | 26 (2)              | 0.7379                      |
|                                | Median (Q1–Q3) | 50.0 (0.0–100.0)                                                  | 0.0 (0.0–25.0)   | 0.0 (0.0–50.0)      | 0.0 (0.0–25.0)      |                             |
| <b>Aggressiveness</b>          | n (missing)    | 2 (0)                                                             | 18 (1)           | 40 (1)              | 26 (2)              | 0.5338                      |
|                                | Median (Q1–Q3) | 50.0 (0.0–100.0)                                                  | 0.0 (0.0–25.0)   | 0.0 (0.0–25.0)      | 0.0 (0.0–0.0)       |                             |
| <b>Moodiness</b>               | n (missing)    | 2 (0)                                                             | 18 (1)           | 40 (1)              | 26 (2)              | 0.2045                      |
|                                | Median (Q1–Q3) | 50.0 (0.0–100.0)                                                  | 0.0 (0.0–25.0)   | 12.5 (0.0–50.0)     | 0.0 (0.0–25.0)      |                             |
| <b>Sadness</b>                 | n (missing)    | 2 (0)                                                             | 18 (1)           | 40 (1)              | 27 (1)              | 0.1795                      |
|                                | Median (Q1–Q3) | 62.5 (25.0–100.0)                                                 | 0.0 (0.0–25.0)   | 0.0 (0.0–25.0)      | 0.0 (0.0–25.0)      |                             |
| <b>Anxiety</b>                 | n (missing)    | 2 (0)                                                             | 18 (1)           | 40 (1)              | 26 (2)              | 0.3472                      |
|                                | Median (Q1–Q3) | 25.0 (0.0–50.0)                                                   | 0.0 (0.0–0.0)    | 0.0 (0.0–25.0)      | 0.0 (0.0–0.0)       |                             |
| <b>Lack of concentration</b>   | n (missing)    | 2 (0)                                                             | 17 (2)           | 34 (7)              | 25 (3)              | 0.5387                      |
|                                | Median (Q1–Q3) | 50.0 (25.0–75.0)                                                  | 25.0 (0.0–25.0)  | 0.0 (0.0–50.0)      | 0.0 (0.0–25.0)      |                             |
| <b>Slow thinking</b>           | n (missing)    | 2 (0)                                                             | 17 (2)           | 33 (8)              | 25 (3)              | 0.4529                      |
|                                | Median (Q1–Q3) | 37.5 (25.0–50.0)                                                  | 25.0 (0.0–50.0)  | 0.0 (0.0–50.0)      | 25.0 (0.0–25.0)     |                             |
| <b>Emotional impact of PKU</b> | n (missing)    | 2 (0)                                                             | 18 (1)           | 40 (1)              | 26 (2)              | 0.6903                      |
|                                | Median (Q1–Q3) | 41.7 (25.0–58.3)                                                  | 37.5 (16.7–58.3) | 29.2 (12.5–54.2)    | 29.2 (16.7–41.7)    |                             |
| <b>Practical impact of PKU</b> | n (missing)    | 2 (0)                                                             | 18 (1)           | 40 (1)              | 27 (1)              | 0.9002                      |
|                                | Median (Q1–Q3) | 25.0 (0.0–50.0)                                                   | 0.0 (0.0–12.5)   | 0.0 (0.0–25.0)      | 0.0 (0.0–25.0)      |                             |

|                                                          |                | Overall assessment of health status by the clinician <sup>a</sup> |                  |                     |                     | p-value<br>(Kruskal-Wallis) |
|----------------------------------------------------------|----------------|-------------------------------------------------------------------|------------------|---------------------|---------------------|-----------------------------|
|                                                          |                | Fair<br>(n=2)                                                     | Good<br>(n=19)   | Very good<br>(n=41) | Excellent<br>(n=28) |                             |
| Social impact of PKU                                     | n (missing)    | 2 (0)                                                             | 18 (1)           | 40 (1)              | 26 (2)              | 0.0856                      |
|                                                          | Median (Q1–Q3) | 37.5 (16.7–58.3)                                                  | 25.0 (16.7–33.3) | 16.7 (8.3–25.0)     | 8.3 (0.0–16.7)      |                             |
| Overall impact of PKU                                    | n (missing)    | 2 (0)                                                             | 18 (1)           | 40 (1)              | 26 (2)              | 0.1611                      |
|                                                          | Median (Q1–Q3) | 35.9 (28.1–43.8)                                                  | 28.1 (18.8–34.4) | 18.8 (12.5–29.7)    | 17.2 (9.4–25.0)     |                             |
| Anxiety – blood test                                     | n (missing)    | 2 (0)                                                             | 17 (2)           | 40 (1)              | 27 (1)              | 0.2659                      |
|                                                          | Median (Q1–Q3) | 0.0 (0.0–0.0)                                                     | 0.0 (0.0–12.5)   | 12.5 (0.0–25.0)     | 0.0 (0.0–12.5)      |                             |
| Anxiety – Phe levels                                     | n (missing)    | 2 (0)                                                             | 18 (1)           | 40 (1)              | 27 (1)              | 0.9023                      |
|                                                          | Median (Q1–Q3) | 50.0 (25.0–75.0)                                                  | 25.0 (25.0–50.0) | 50.0 (25.0–87.5)    | 50.0 (0.0–75.0)     |                             |
| Adherence to supplements                                 | n (missing)    | 2 (0)                                                             | 17 (2)           | 39 (2)              | 24 (4)              | 0.8713                      |
|                                                          | Median (Q1–Q3) | 50.0 (0.0–100.0)                                                  | 0.0 (0.0–12.5)   | 0.0 (0.0–12.5)      | 0.0 (0.0–12.5)      |                             |
| Practical impact of supplements                          | n (missing)    | 2 (0)                                                             | 17 (2)           | 39 (2)              | 25 (3)              | 0.5710                      |
|                                                          | Median (Q1–Q3) | 50.0 (0.0–100.0)                                                  | 0.0 (0.0–75.0)   | 0.0 (0.0–25.0)      | 0.0 (0.0–0.0)       |                             |
| Guilt if poor adherence to supplements                   | n (missing)    | 2 (0)                                                             | 17 (2)           | 38 (3)              | 23 (5)              | 0.4441                      |
|                                                          | Median (Q1–Q3) | 12.5 (0.0–25.0)                                                   | 25.0 (25.0–50.0) | 50.0 (25.0–100.0)   | 25.0 (0.0–75.0)     |                             |
| Relationships within family because of supplements       | n (missing)    | 2 (0)                                                             | 17 (2)           | 39 (2)              | 25 (3)              | 0.3638                      |
|                                                          | Median (Q1–Q3) | 25.0 (0.0–50.0)                                                   | 0.0 (0.0–0.0)    | 0.0 (0.0–25.0)      | 0.0 (0.0–0.0)       |                             |
| Taste – supplements                                      | n (missing)    | 2 (0)                                                             | 17 (2)           | 39 (2)              | 23 (5)              | 0.0629                      |
|                                                          | Median (Q1–Q3) | 0.0 (0.0–0.0)                                                     | 25.0 (0.0–50.0)  | 25.0 (0.0–50.0)     | 50.0 (25.0–75.0)    |                             |
| Food temptations                                         | n (missing)    | 2 (0)                                                             | 16 (3)           | 39 (2)              | 26 (2)              | 0.5450                      |
|                                                          | Median (Q1–Q3) | 31.3 (25.0–37.5)                                                  | 18.8 (0.0–25.0)  | 25.0 (0.0–50.0)     | 31.3 (0.0–50.0)     |                             |
| Adherence to dietary protein-restriction                 | n (missing)    | 2 (0)                                                             | 16 (3)           | 38 (3)              | 27 (1)              | 0.0589                      |
|                                                          | Median (Q1–Q3) | 37.5 (25.0–50.0)                                                  | 0.0 (0.0–12.5)   | 0.0 (0.0–12.5)      | 0.0 (0.0–0.0)       |                             |
| Social impact of dietary protein restriction             | n (missing)    | 2 (0)                                                             | 16 (3)           | 39 (2)              | 27 (1)              | 0.8839                      |
|                                                          | Median (Q1–Q3) | 22.5 (5.0–40.0)                                                   | 17.5 (0.0–35.0)  | 15.0 (5.0–25.0)     | 15.0 (0.0–30.0)     |                             |
| Taste – low-protein food                                 | n (missing)    | 2 (0)                                                             | 16 (3)           | 37 (4)              | 22 (6)              | 0.3896                      |
|                                                          | Median (Q1–Q3) | 0.0 (0.0–0.0)                                                     | 12.5 (0.0–25.0)  | 25.0 (0.0–25.0)     | 0.0 (0.0–25.0)      |                             |
| Food enjoyment                                           | n (missing)    | 2 (0)                                                             | 18 (1)           | 40 (1)              | 27 (1)              | 0.2676                      |
|                                                          | Median (Q1–Q3) | 50.0 (0.0–100.0)                                                  | 0.0 (0.0–25.0)   | 25.0 (0.0–25.0)     | 0.0 (0.0–25.0)      |                             |
| Guilt if dietary protein restriction not followed        | n (missing)    | 2 (0)                                                             | 16 (3)           | 38 (3)              | 25 (3)              | 0.8701                      |
|                                                          | Median (Q1–Q3) | 62.5 (25.0–100.0)                                                 | 62.5 (25.0–87.5) | 50.0 (25.0–100.0)   | 50.0 (0.0–100.0)    |                             |
| Overall difficulty following dietary protein restriction | n (missing)    | 2 (0)                                                             | 16 (3)           | 39 (2)              | 27 (1)              | 0.3617                      |
|                                                          | Median (Q1–Q3) | 0.0 (0.0–0.0)                                                     | 12.5 (0.0–25.0)  | 25.0 (0.0–25.0)     | 0.0 (0.0–25.0)      |                             |

|  |  | Overall assessment of health status by the clinician <sup>a</sup> |                |                     |                     |                                 |
|--|--|-------------------------------------------------------------------|----------------|---------------------|---------------------|---------------------------------|
|  |  | Fair<br>(n=2)                                                     | Good<br>(n=19) | Very good<br>(n=41) | Excellent<br>(n=28) | p-value<br>(Kruskal-<br>Wallis) |

Phe: phenylalanine; PKU: phenylketonuria; Q: quartile; QOL: quality of life.

<sup>a</sup>Modality Poor (n=0).

**Table 2-2 - Clinical validity of the Child PKU-QOL questionnaire: comparison of PKU-QOL scores according to severity of PKU defined by Phe levels at diagnosis in the child evaluable population (n=92)**

*Scores of 0 indicate no impact (or no symptom for symptom scores), scores of 25 indicate a mild impact (or rare symptoms), scores of 50 indicate a moderate impact (or occasional symptoms), scores of 75 indicate major impact (or frequent symptom), scores of 100 indicate extremely severe impact (or very frequent symptoms)*

|                                |                | Severity of PKU                                                |                                                       |                                        |
|--------------------------------|----------------|----------------------------------------------------------------|-------------------------------------------------------|----------------------------------------|
|                                |                | Mild-moderate PKU<br>(Phe level: 600–1200<br>µmol/L)<br>(n=22) | Classic PKU<br>(Phe level: >1200<br>µmol/L)<br>(n=66) | p-value<br>(Mann–Whitney<br>/Wilcoxon) |
| <b>Headaches</b>               | n (missing)    | 20 (2)                                                         | 64 (2)                                                | 0.8170                                 |
|                                | Median (Q1–Q3) | 0.0 (0.0–37.5)                                                 | 0.0 (0.0–25.0)                                        |                                        |
| <b>Stomach aches</b>           | n (missing)    | 20 (2)                                                         | 64 (2)                                                | 0.4553                                 |
|                                | Median (Q1–Q3) | 0.0 (0.0–50.0)                                                 | 0.0 (0.0–25.0)                                        |                                        |
| <b>Tiredness</b>               | n (missing)    | 20 (2)                                                         | 64 (2)                                                | 0.6657                                 |
|                                | Median (Q1–Q3) | 50.0 (0.0–62.5)                                                | 25.0 (25.0–50.0)                                      |                                        |
| <b>Irritability</b>            | n (missing)    | 20 (2)                                                         | 64 (2)                                                | 0.9479                                 |
|                                | Median (Q1–Q3) | 0.0 (0.0–50.0)                                                 | 0.0 (0.0–25.0)                                        |                                        |
| <b>Aggressiveness</b>          | n (missing)    | 20 (2)                                                         | 64 (2)                                                | 0.2383                                 |
|                                | Median (Q1–Q3) | 0.0 (0.0–50.0)                                                 | 0.0 (0.0–12.5)                                        |                                        |
| <b>Moodiness</b>               | n (missing)    | 20 (2)                                                         | 64 (2)                                                | 0.3343                                 |
|                                | Median (Q1–Q3) | 0.0 (0.0–50.0)                                                 | 0.0 (0.0–25.0)                                        |                                        |
| <b>Sadness</b>                 | n (missing)    | 21 (1)                                                         | 64 (2)                                                | 0.4173                                 |
|                                | Median (Q1–Q3) | 0.0 (0.0–50.0)                                                 | 0.0 (0.0–25.0)                                        |                                        |
| <b>Anxiety</b>                 | n (missing)    | 20 (2)                                                         | 64 (2)                                                | 0.7245                                 |
|                                | Median (Q1–Q3) | 0.0 (0.0–0.0)                                                  | 0.0 (0.0–12.5)                                        |                                        |
| <b>Lack of concentration</b>   | n (missing)    | 19 (3)                                                         | 57 (9)                                                | 0.8866                                 |
|                                | Median (Q1–Q3) | 0.0 (0.0–50.0)                                                 | 25.0 (0.0–25.0)                                       |                                        |
| <b>Slow thinking</b>           | n (missing)    | 19 (3)                                                         | 56 (10)                                               | 0.9379                                 |
|                                | Median (Q1–Q3) | 25.0 (0.0–25.0)                                                | 25.0 (0.0–50.0)                                       |                                        |
| <b>Emotional impact of PKU</b> | n (missing)    | 21 (1)                                                         | 63 (3)                                                | 0.4957                                 |
|                                | Median (Q1–Q3) | 33.3 (16.7–50.0)                                               | 25.0 (16.7–50.0)                                      |                                        |
| <b>Practical impact of PKU</b> | n (missing)    | 21 (1)                                                         | 64 (2)                                                | 0.3251                                 |
|                                | Median (Q1–Q3) | 0.0 (0.0–25.0)                                                 | 0.0 (0.0–12.5)                                        |                                        |
| <b>Social impact of PKU</b>    | n (missing)    | 21 (1)                                                         | 63 (3)                                                | 0.8296                                 |
|                                | Median (Q1–Q3) | 16.7 (0.0–33.3)                                                | 16.7 (8.3–25.0)                                       |                                        |
| <b>Overall impact of PKU</b>   | n (missing)    | 21 (1)                                                         | 63 (3)                                                | 0.4928                                 |

|                                                                 |                | Severity of PKU                                                |                                                       |                                        |
|-----------------------------------------------------------------|----------------|----------------------------------------------------------------|-------------------------------------------------------|----------------------------------------|
|                                                                 |                | Mild-moderate PKU<br>(Phe level: 600–1200<br>μmol/L)<br>(n=22) | Classic PKU<br>(Phe level: >1200<br>μmol/L)<br>(n=66) | p-value<br>(Mann–Whitney<br>/Wilcoxon) |
|                                                                 | Median (Q1–Q3) | 18.8 (12.5–37.5)                                               | 18.8 (9.4–31.3)                                       |                                        |
| <b>Anxiety – blood test</b>                                     | n (missing)    | 21 (1)                                                         | 63 (3)                                                | 0.1812                                 |
|                                                                 | Median (Q1–Q3) | 0.0 (0.0–12.5)                                                 | 12.5 (0.0–25.0)                                       |                                        |
| <b>Anxiety – Phe levels</b>                                     | n (missing)    | 21 (1)                                                         | 64 (2)                                                | 0.1019                                 |
|                                                                 | Median (Q1–Q3) | 50.0 (25.0–100.0)                                              | 25.0 (12.5–75.0)                                      |                                        |
| <b>Adherence to supplements</b>                                 | n (missing)    | 17 (5)                                                         | 63 (3)                                                | 0.3270                                 |
|                                                                 | Median (Q1–Q3) | 12.5 (0.0–25.0)                                                | 0.0 (0.0–12.5)                                        |                                        |
| <b>Practical impact of supplements</b>                          | n (missing)    | 18 (4)                                                         | 63 (3)                                                | 0.3909                                 |
|                                                                 | Median (Q1–Q3) | 0.0 (0.0–0.0)                                                  | 0.0 (0.0–50.0)                                        |                                        |
| <b>Guilt if poor adherence to supplements</b>                   | n (missing)    | 17 (5)                                                         | 61 (5)                                                | 0.0089                                 |
|                                                                 | Median (Q1–Q3) | 0.0 (0.0–50.0)                                                 | 50.0 (25.0–100.0)                                     |                                        |
| <b>Relationships within family because of supplements</b>       | n (missing)    | 18 (4)                                                         | 63 (3)                                                | 0.0903                                 |
|                                                                 | Median (Q1–Q3) | 0.0 (0.0–50.0)                                                 | 0.0 (0.0–0.0)                                         |                                        |
| <b>Taste – supplements</b>                                      | n (missing)    | 17 (5)                                                         | 62 (4)                                                | 0.0267                                 |
|                                                                 | Median (Q1–Q3) | 50.0 (50.0–50.0)                                               | 25.0 (0.0–50.0)                                       |                                        |
| <b>Food temptations</b>                                         | n (missing)    | 19 (3)                                                         | 63 (3)                                                | 0.1289                                 |
|                                                                 | Median (Q1–Q3) | 37.5 (0.0–75.0)                                                | 25.0 (0.0–50.0)                                       |                                        |
| <b>Adherence to dietary protein restriction</b>                 | n (missing)    | 19 (3)                                                         | 62 (4)                                                | 0.7607                                 |
|                                                                 | Median (Q1–Q3) | 0.0 (0.0–12.5)                                                 | 0.0 (0.0–12.5)                                        |                                        |
| <b>Social impact of dietary protein restriction</b>             | n (missing)    | 19 (3)                                                         | 63 (3)                                                | 0.1962                                 |
|                                                                 | Median (Q1–Q3) | 15.0 (5.0–45.0)                                                | 12.5 (5.0–30.0)                                       |                                        |
| <b>Taste – low-protein food</b>                                 | n (missing)    | 13 (9)                                                         | 62 (4)                                                | 0.7134                                 |
|                                                                 | Median (Q1–Q3) | 25.0 (0.0–25.0)                                                | 25.0 (0.0–25.0)                                       |                                        |
| <b>Food enjoyment</b>                                           | n (missing)    | 21 (1)                                                         | 64 (2)                                                | 0.7867                                 |
|                                                                 | Median (Q1–Q3) | 0.0 (0.0–50.0)                                                 | 0.0 (0.0–25.0)                                        |                                        |
| <b>Guilt if dietary protein restriction not followed</b>        | n (missing)    | 19 (3)                                                         | 60 (6)                                                | 0.0592                                 |
|                                                                 | Median (Q1–Q3) | 0.0 (0.0–100.0)                                                | 62.5 (25.0–100.0)                                     |                                        |
| <b>Overall difficulty following dietary protein restriction</b> | n (missing)    | 19 (3)                                                         | 63 (3)                                                | 0.6642                                 |
|                                                                 | Median (Q1–Q3) | 0.0 (0.0–50.0)                                                 | 0.0 (0.0–25.0)                                        |                                        |

Phe: phenylalanine; PKU: phenylketonuria; Q: quartile; QOL: quality of life.
