# Supplementary material for: Development and psychometric validation of measures to assess the impact of phenylketonuria and its dietary treatment on patients’ and parents’ quality of life: the phenylketonuria – quality of life (PKU-QOL) questionnaires
Source: PubMed Central journal article supplement (PMC4449597; doi:10.1186/s13023-015-0261-6), 2015-05-10
Supplement: 13023_2015_261_MOESM3_ESM.pdf [file 13023_2015_261_MOESM3_ESM.pdf]

## Additional file 3

### Clinical validity of the Adolescent PKU-QOL questionnaire

**Table 3-1 - Clinical validity of the Adolescent PKU-QOL questionnaire: comparison of PKU-QOL scores according to patient overall health status as rated by the clinician in the adolescent evaluable population (n=110)**

*Scores of 0 indicate no impact (or no symptom for symptom scores), scores of 25 indicate a mild impact (or rare symptoms), scores of 50 indicate a moderate impact (or occasional symptoms), scores of 75 indicate major impact (or frequent symptom), scores of 100 indicate extremely severe impact (or very frequent symptoms)*

|                                 |                | Overall assessment of health status by the clinician <sup>a</sup> |                     |                     | p-value<br>(Kruskal-Wallis) |
|---------------------------------|----------------|-------------------------------------------------------------------|---------------------|---------------------|-----------------------------|
|                                 |                | Good<br>(n=38)                                                    | Very good<br>(n=42) | Excellent<br>(n=30) |                             |
| <b>Self-rated health status</b> | n (missing)    | 35 (3)                                                            | 40 (2)              | 30 (0)              | 0.0012                      |
|                                 | Median (Q1–Q3) | 50.0 (25.0–50.0)                                                  | 50.0 (25.0–50.0)    | 12.5 (0.0–50.0)     |                             |
| <b>Headaches</b>                | n (missing)    | 35 (3)                                                            | 40 (2)              | 30 (0)              | 0.9077                      |
|                                 | Median (Q1–Q3) | 0.0 (0.0–50.0)                                                    | 12.5 (0.0–37.5)     | 12.5 (0.0–25.0)     |                             |
| <b>Stomach aches</b>            | n (missing)    | 35 (3)                                                            | 40 (2)              | 30 (0)              | 0.3551                      |
|                                 | Median (Q1–Q3) | 0.0 (0.0–25.0)                                                    | 0.0 (0.0–25.0)      | 0.0 (0.0–25.0)      |                             |
| <b>Tiredness</b>                | n (missing)    | 35 (3)                                                            | 40 (2)              | 30 (0)              | 0.2638                      |
|                                 | Median (Q1–Q3) | 50.0 (25.0–75.0)                                                  | 50.0 (25.0–50.0)    | 25.0 (25.0–50.0)    |                             |
| <b>Lack of concentration</b>    | n (missing)    | 35 (3)                                                            | 42 (0)              | 30 (0)              | 0.0566                      |
|                                 | Median (Q1–Q3) | 25.0 (0.0–50.0)                                                   | 0.0 (0.0–25.0)      | 0.0 (0.0–25.0)      |                             |
| <b>Slow thinking</b>            | n (missing)    | 35 (3)                                                            | 42 (0)              | 30 (0)              | 0.5488                      |
|                                 | Median (Q1–Q3) | 0.0 (0.0–25.0)                                                    | 0.0 (0.0–25.0)      | 0.0 (0.0–25.0)      |                             |
| <b>Irritability</b>             | n (missing)    | 35 (3)                                                            | 42 (0)              | 30 (0)              | 0.0618                      |
|                                 | Median (Q1–Q3) | 50.0 (0.0–50.0)                                                   | 0.0 (0.0–25.0)      | 25.0 (0.0–25.0)     |                             |
| <b>Aggressiveness</b>           | n (missing)    | 35 (3)                                                            | 42 (0)              | 30 (0)              | 0.3053                      |
|                                 | Median (Q1–Q3) | 0.0 (0.0–50.0)                                                    | 0.0 (0.0–0.0)       | 0.0 (0.0–0.0)       |                             |
| <b>Moodiness</b>                | n (missing)    | 35 (3)                                                            | 42 (0)              | 30 (0)              | 0.3366                      |
|                                 | Median (Q1–Q3) | 25.0 (0.0–25.0)                                                   | 0.0 (0.0–25.0)      | 12.5 (0.0–50.0)     |                             |
| <b>Sadness</b>                  | n (missing)    | 35 (3)                                                            | 42 (0)              | 30 (0)              | 0.5701                      |
|                                 | Median (Q1–Q3) | 0.0 (0.0–25.0)                                                    | 0.0 (0.0–25.0)      | 0.0 (0.0–25.0)      |                             |
| <b>Anxiety</b>                  | n (missing)    | 35 (3)                                                            | 42 (0)              | 30 (0)              | 0.0770                      |
|                                 | Median (Q1–Q3) | 0.0 (0.0–25.0)                                                    | 0.0 (0.0–25.0)      | 0.0 (0.0–0.0)       |                             |
| <b>Emotional impact of PKU</b>  | n (missing)    | 35 (3)                                                            | 41 (1)              | 30 (0)              | 0.1650                      |
|                                 | Median (Q1–Q3) | 30.0 (25.0–55.0)                                                  | 30.0 (15.0–40.0)    | 30.0 (20.0–35.0)    |                             |
| <b>Practical impact of</b>      | n (missing)    | 16 (22)                                                           | 25 (17)             | 11 (19)             | 0.0950                      |

|                                                                 |                | Overall assessment of health status by the clinician <sup>a</sup> |                     |                     |                                 |
|-----------------------------------------------------------------|----------------|-------------------------------------------------------------------|---------------------|---------------------|---------------------------------|
|                                                                 |                | Good<br>(n=38)                                                    | Very good<br>(n=42) | Excellent<br>(n=30) | p-value<br>(Kruskal-<br>Wallis) |
| <b>PKU</b>                                                      | Median (Q1–Q3) | 16.7 (4.2–33.3)                                                   | 8.3 (0.0–8.3)       | 8.3 (0.0–8.3)       |                                 |
| <b>Social impact of PKU</b>                                     | n (missing)    | 35 (3)                                                            | 41 (1)              | 29 (1)              | 0.7230                          |
|                                                                 | Median (Q1–Q3) | 16.7 (8.3–25.0)                                                   | 8.3 (8.3–25.0)      | 8.3 (8.3–25.0)      |                                 |
| <b>Overall impact of PKU</b>                                    | n (missing)    | 35 (3)                                                            | 41 (1)              | 30 (0)              | 0.0931                          |
|                                                                 | Median (Q1–Q3) | 25.0 (15.0–38.9)                                                  | 20.0 (9.1–27.3)     | 17.5 (12.5–25.0)    |                                 |
| <b>Anxiety – blood test</b>                                     | n (missing)    | 35 (3)                                                            | 41 (1)              | 30 (0)              | 0.9904                          |
|                                                                 | Median (Q1–Q3) | 0.0 (0.0–12.5)                                                    | 0.0 (0.0–12.5)      | 0.0 (0.0–12.5)      |                                 |
| <b>Anxiety – Phe levels</b>                                     | n (missing)    | 35 (3)                                                            | 41 (1)              | 30 (0)              | 0.5299                          |
|                                                                 | Median (Q1–Q3) | 50.0 (0.0–75.0)                                                   | 25.0 (0.0–50.0)     | 25.0 (0.0–50.0)     |                                 |
| <b>Adherence to supplements</b>                                 | n (missing)    | 31 (7)                                                            | 37 (5)              | 24 (6)              | 0.2385                          |
|                                                                 | Median (Q1–Q3) | 8.3 (0.0–33.3)                                                    | 6.3 (0.0–25.0)      | 6.3 (0.0–17.7)      |                                 |
| <b>Practical impact of supplements</b>                          | n (missing)    | 32 (6)                                                            | 37 (5)              | 25 (5)              | 0.4469                          |
|                                                                 | Median (Q1–Q3) | 12.5 (0.0–34.4)                                                   | 12.5 (0.0–25.0)     | 6.3 (0.0–31.3)      |                                 |
| <b>Guilt if poor adherence to supplements</b>                   | n (missing)    | 31 (7)                                                            | 37 (5)              | 26 (4)              | 0.8585                          |
|                                                                 | Median (Q1–Q3) | 25.0 (25.0–75.0)                                                  | 25.0 (0.0–75.0)     | 50.0 (25.0–75.0)    |                                 |
| <b>Relationships within family because of supplements</b>       | n (missing)    | 32 (6)                                                            | 37 (5)              | 25 (5)              | 0.9829                          |
|                                                                 | Median (Q1–Q3) | 0.0 (0.0–25.0)                                                    | 0.0 (0.0–25.0)      | 0.0 (0.0–25.0)      |                                 |
| <b>Taste – supplements</b>                                      | n (missing)    | 32 (6)                                                            | 37 (5)              | 25 (5)              | 0.6335                          |
|                                                                 | Median (Q1–Q3) | 50.0 (25.0–50.0)                                                  | 50.0 (25.0–50.0)    | 50.0 (25.0–50.0)    |                                 |
| <b>Food temptations</b>                                         | n (missing)    | 30 (8)                                                            | 38 (4)              | 23 (7)              | 0.3603                          |
|                                                                 | Median (Q1–Q3) | 25.0 (0.0–50.0)                                                   | 25.0 (0.0–50.0)     | 12.5 (0.0–37.5)     |                                 |
| <b>Adherence to dietary protein restriction</b>                 | n (missing)    | 29 (9)                                                            | 38 (4)              | 22 (8)              | 0.0826                          |
|                                                                 | Median (Q1–Q3) | 12.5 (0.0–33.3)                                                   | 8.3 (0.0–18.8)      | 0.0 (0.0–12.5)      |                                 |
| <b>Social impact of dietary protein restriction</b>             | n (missing)    | 32 (6)                                                            | 38 (4)              | 23 (7)              | 0.3555                          |
|                                                                 | Median (Q1–Q3) | 7.5 (0.0–37.5)                                                    | 5.0 (0.0–10.0)      | 5.0 (0.0–20.0)      |                                 |
| <b>Practical impact of dietary protein restriction</b>          | n (missing)    | 26 (12)                                                           | 26 (16)             | 18 (12)             | 0.6588                          |
|                                                                 | Median (Q1–Q3) | 26.8 (17.9–42.9)                                                  | 24.3 (14.3–30.0)    | 28.6 (20.0–30.0)    |                                 |
| <b>Overall impact of dietary protein restriction</b>            | n (missing)    | 30 (8)                                                            | 36 (6)              | 22 (8)              | 0.1773                          |
|                                                                 | Median (Q1–Q3) | 19.4 (11.4–36.4)                                                  | 13.1 (5.7–23.9)     | 18.2 (9.4–22.5)     |                                 |
| <b>Taste – low-protein food</b>                                 | n (missing)    | 31 (7)                                                            | 34 (8)              | 19 (11)             | 0.2281                          |
|                                                                 | Median (Q1–Q3) | 25.0 (0.0–50.0)                                                   | 25.0 (0.0–25.0)     | 25.0 (0.0–50.0)     |                                 |
| <b>Food enjoyment</b>                                           | n (missing)    | 30 (8)                                                            | 37 (5)              | 23 (7)              | 0.4605                          |
|                                                                 | Median (Q1–Q3) | 0.0 (0.0–25.0)                                                    | 0.0 (0.0–25.0)      | 0.0 (0.0–25.0)      |                                 |
| <b>Guilt if dietary protein restriction not followed</b>        | n (missing)    | 31 (7)                                                            | 39 (3)              | 23 (7)              | 0.6572                          |
|                                                                 | Median (Q1–Q3) | 50.0 (0.0–75.0)                                                   | 50.0 (25.0–100.0)   | 50.0 (25.0–75.0)    |                                 |
| <b>Overall difficulty following dietary protein restriction</b> | n (missing)    | 33 (5)                                                            | 38 (4)              | 23 (7)              | 0.4579                          |
|                                                                 | Median (Q1–Q3) | 0.0 (0.0–25.0)                                                    | 0.0 (0.0–25.0)      | 0.0 (0.0–25.0)      |                                 |

|  |  | Overall assessment of health status by the clinician <sup>a</sup> |                     |                     |                                 |
|--|--|-------------------------------------------------------------------|---------------------|---------------------|---------------------------------|
|  |  | Good<br>(n=38)                                                    | Very good<br>(n=42) | Excellent<br>(n=30) | p-value<br>(Kruskal-<br>Wallis) |

Phe: phenylalanine; PKU: phenylketonuria; Q: quartile; QOL: quality of life.

<sup>a</sup>Modality Poor (n=0) and Fair (n=0).

**Table 3-2 - Clinical validity of the Adolescent PKU-QOL questionnaire: comparison of PKU-QOL scores according to severity of PKU defined by Phe levels at diagnosis in the adolescent evaluable population (n=110)**

*Scores of 0 indicate no impact (or no symptom for symptom scores), scores of 25 indicate a mild impact (or rare symptoms), scores of 50 indicate a moderate impact (or occasional symptoms), scores of 75 indicate major impact (or frequent symptom), scores of 100 indicate extremely severe impact (or very frequent symptoms)*

|                                 |                | Severity of PKU                                                |                                                       |                                        |
|---------------------------------|----------------|----------------------------------------------------------------|-------------------------------------------------------|----------------------------------------|
|                                 |                | Mild-moderate PKU<br>(Phe level: 600-1200<br>µmol/L)<br>(n=33) | Classic PKU<br>(Phe level: >1200<br>µmol/L)<br>(n=75) | p-value<br>(Mann-Whitney<br>/Wilcoxon) |
| <b>Self-rated health status</b> | n (missing)    | 31 (2)                                                         | 72 (3)                                                | 0.0117                                 |
|                                 | Median (Q1–Q3) | 25.0 (0.0–50.0)                                                | 50.0 (25.0–50.0)                                      |                                        |
| <b>Headaches</b>                | n (missing)    | 31 (2)                                                         | 72 (3)                                                | 0.2448                                 |
|                                 | Median (Q1–Q3) | 0.0 (0.0–25.0)                                                 | 25.0 (0.0–37.5)                                       |                                        |
| <b>Stomach aches</b>            | n (missing)    | 31 (2)                                                         | 72 (3)                                                | 0.7159                                 |
|                                 | Median (Q1–Q3) | 0.0 (0.0–25.0)                                                 | 0.0 (0.0–25.0)                                        |                                        |
| <b>Tiredness</b>                | n (missing)    | 31 (2)                                                         | 72 (3)                                                | 0.6315                                 |
|                                 | Median (Q1–Q3) | 50.0 (25.0–50.0)                                               | 50.0 (25.0–50.0)                                      |                                        |
| <b>Lack of concentration</b>    | n (missing)    | 33 (0)                                                         | 72 (3)                                                | 0.1403                                 |
|                                 | Median (Q1–Q3) | 0.0 (0.0–25.0)                                                 | 25.0 (0.0–50.0)                                       |                                        |
| <b>Slow thinking</b>            | n (missing)    | 33 (0)                                                         | 72 (3)                                                | 0.1714                                 |
|                                 | Median (Q1–Q3) | 0.0 (0.0–25.0)                                                 | 0.0 (0.0–25.0)                                        |                                        |
| <b>Irritability</b>             | n (missing)    | 33 (0)                                                         | 72 (3)                                                | 0.2132                                 |
|                                 | Median (Q1–Q3) | 25.0 (0.0–25.0)                                                | 25.0 (0.0–50.0)                                       |                                        |
| <b>Aggressiveness</b>           | n (missing)    | 33 (0)                                                         | 72 (3)                                                | 0.4937                                 |
|                                 | Median (Q1–Q3) | 0.0 (0.0–0.0)                                                  | 0.0 (0.0–25.0)                                        |                                        |
| <b>Moodiness</b>                | n (missing)    | 33 (0)                                                         | 72 (3)                                                | 0.0302                                 |
|                                 | Median (Q1–Q3) | 0.0 (0.0–25.0)                                                 | 25.0 (0.0–50.0)                                       |                                        |
| <b>Sadness</b>                  | n (missing)    | 33 (0)                                                         | 72 (3)                                                | 0.2927                                 |
|                                 | Median (Q1–Q3) | 0.0 (0.0–0.0)                                                  | 0.0 (0.0–25.0)                                        |                                        |
| <b>Anxiety</b>                  | n (missing)    | 33 (0)                                                         | 72 (3)                                                | 1.0000                                 |
|                                 | Median (Q1–Q3) | 0.0 (0.0–25.0)                                                 | 0.0 (0.0–25.0)                                        |                                        |
| <b>Emotional impact of PKU</b>  | n (missing)    | 32 (1)                                                         | 72 (3)                                                | 0.1148                                 |
|                                 | Median (Q1–Q3) | 27.5 (15.0–37.5)                                               | 30.0 (20.0–50.0)                                      |                                        |
| <b>Practical impact of PKU</b>  | n (missing)    | 12 (21)                                                        | 40 (35)                                               | 0.4404                                 |
|                                 | Median (Q1–Q3) | 4.2 (0.0–16.7)                                                 | 8.3 (0.0–25.0)                                        |                                        |
| <b>Social impact of PKU</b>     | n (missing)    | 31 (2)                                                         | 72 (3)                                                | 0.1055                                 |

|                                                           |                | Severity of PKU                                                |                                                       |                                        |
|-----------------------------------------------------------|----------------|----------------------------------------------------------------|-------------------------------------------------------|----------------------------------------|
|                                                           |                | Mild-moderate PKU<br>(Phe level: 600-1200<br>µmol/L)<br>(n=33) | Classic PKU<br>(Phe level: >1200<br>µmol/L)<br>(n=75) | p-value<br>(Mann-Whitney<br>/Wilcoxon) |
|                                                           | Median (Q1–Q3) | 8.3 (0.0–25.0)                                                 | 16.7 (8.3–25.0)                                       |                                        |
| <b>Overall impact of PKU</b>                              | n (missing)    | 32 (1)                                                         | 72 (3)                                                | 0.0674                                 |
|                                                           | Median (Q1–Q3) | 17.5 (11.3–25.0)                                               | 22.6 (13.1–34.5)                                      |                                        |
| <b>Anxiety – blood test</b>                               | n (missing)    | 32 (1)                                                         | 72 (3)                                                | 0.6901                                 |
|                                                           | Median (Q1–Q3) | 0.0 (0.0–12.5)                                                 | 0.0 (0.0–12.5)                                        |                                        |
| <b>Anxiety – Phe levels</b>                               | n (missing)    | 32 (1)                                                         | 72 (3)                                                | 0.2554                                 |
|                                                           | Median (Q1–Q3) | 25.0 (0.0–50.0)                                                | 25.0 (12.5–62.5)                                      |                                        |
| <b>Adherence to supplements</b>                           | n (missing)    | 21 (12)                                                        | 70 (5)                                                | 0.5896                                 |
|                                                           | Median (Q1–Q3) | 6.3 (0.0–16.7)                                                 | 6.3 (0.0–25.0)                                        |                                        |
| <b>Practical impact of supplements</b>                    | n (missing)    | 21 (12)                                                        | 72 (3)                                                | 0.0132                                 |
|                                                           | Median (Q1–Q3) | 6.3 (0.0–12.5)                                                 | 18.8 (0.0–34.4)                                       |                                        |
| <b>Guilt if poor adherence to supplements</b>             | n (missing)    | 22 (11)                                                        | 71 (4)                                                | 0.3961                                 |
|                                                           | Median (Q1–Q3) | 25.0 (0.0–50.0)                                                | 25.0 (25.0–75.0)                                      |                                        |
| <b>Relationships within family because of supplements</b> | n (missing)    | 21 (12)                                                        | 72 (3)                                                | 0.6050                                 |
|                                                           | Median (Q1–Q3) | 0.0 (0.0–25.0)                                                 | 0.0 (0.0–25.0)                                        |                                        |
| <b>Taste – supplements</b>                                | n (missing)    | 21 (12)                                                        | 72 (3)                                                | 0.0654                                 |
|                                                           | Median (Q1–Q3) | 50.0 (50.0–50.0)                                               | 37.5 (25.0–50.0)                                      |                                        |
| <b>Food temptations</b>                                   | n (missing)    | 20 (13)                                                        | 70 (5)                                                | 0.1055                                 |
|                                                           | Median (Q1–Q3) | 0.0 (0.0–37.5)                                                 | 25.0 (0.0–50.0)                                       |                                        |
| <b>Adherence to dietary protein restriction</b>           | n (missing)    | 20 (13)                                                        | 68 (7)                                                | 0.1149                                 |
|                                                           | Median (Q1–Q3) | 0.0 (0.0–15.6)                                                 | 10.4 (0.0–25.0)                                       |                                        |
| <b>Social impact of dietary protein restriction</b>       | n (missing)    | 20 (13)                                                        | 72 (3)                                                | 0.0642                                 |
|                                                           | Median (Q1–Q3) | 2.5 (0.0–5.0)                                                  | 7.5 (0.0–25.0)                                        |                                        |
| <b>Practical impact of dietary protein restriction</b>    | n (missing)    | 12 (21)                                                        | 57 (18)                                               | 0.1878                                 |
|                                                           | Median (Q1–Q3) | 20.7 (13.7–28.6)                                               | 28.6 (15.0–35.0)                                      |                                        |
| <b>Overall impact of dietary protein restriction</b>      | n (missing)    | 18 (15)                                                        | 69 (6)                                                | 0.0176                                 |
|                                                           | Median (Q1–Q3) | 13.1 (3.1–18.2)                                                | 18.2 (11.4–27.8)                                      |                                        |
| <b>Taste – low-protein food</b>                           | n (missing)    | 14 (19)                                                        | 69 (6)                                                | 0.6795                                 |
|                                                           | Median (Q1–Q3) | 25.0 (0.0–25.0)                                                | 25.0 (0.0–50.0)                                       |                                        |
| <b>Food enjoyment</b>                                     | n (missing)    | 19 (14)                                                        | 70 (5)                                                | 0.0477                                 |
|                                                           | Median (Q1–Q3) | 0.0 (0.0–0.0)                                                  | 0.0 (0.0–25.0)                                        |                                        |
| <b>Guilt if dietary protein restriction not followed</b>  | n (missing)    | 22 (11)                                                        | 70 (5)                                                | 0.0217                                 |
|                                                           | Median (Q1–Q3) | 25.0 (0.0–50.0)                                                | 50.0 (25.0–75.0)                                      |                                        |
| <b>Overall difficulty following</b>                       | n (missing)    | 21 (12)                                                        | 72 (3)                                                | 0.0533                                 |

|                                    |                | Severity of PKU                                                |                                                       |                                        |
|------------------------------------|----------------|----------------------------------------------------------------|-------------------------------------------------------|----------------------------------------|
|                                    |                | Mild-moderate PKU<br>(Phe level: 600-1200<br>μmol/L)<br>(n=33) | Classic PKU<br>(Phe level: >1200<br>μmol/L)<br>(n=75) | p-value<br>(Mann-Whitney<br>/Wilcoxon) |
| <b>dietary protein restriction</b> | Median (Q1–Q3) | 0.0 (0.0–0.0)                                                  | 0.0 (0.0–25.0)                                        |                                        |

Phe: phenylalanine; PKU: phenylketonuria; Q: quartile; QOL: quality of life.
