# Supplementary material for: Development and psychometric validation of measures to assess the impact of phenylketonuria and its dietary treatment on patients’ and parents’ quality of life: the phenylketonuria – quality of life (PKU-QOL) questionnaires
Source: PubMed Central journal article supplement (PMC4449597; doi:10.1186/s13023-015-0261-6), 2015-05-10
Supplement: 13023_2015_261_MOESM5_ESM.pdf [file 13023_2015_261_MOESM5_ESM.pdf]

## Additional file 05

### Clinical validity of the Parent PKU-QoL questionnaire

**Table 5-1 - Clinical validity of the Parent PKU-QOL Questionnaire: comparison of PKU-QOL scores according to patient overall health status as rated by the clinician in the parent evaluable population (n=253)**

Scores of 0 indicate no impact (or no symptom for symptom scores), scores of 25 indicate a mild impact (or rare symptoms), scores of 50 indicate a moderate impact (or occasional symptoms), scores of 75 indicate major impact (or frequent symptom), scores of 100 indicate extremely severe impact (or very frequent symptoms)

|                                |                | Overall health status as rated by the clinician <sup>a</sup> |                  |                      |                     | p-value<br>(Kruskal-Wallis) |
|--------------------------------|----------------|--------------------------------------------------------------|------------------|----------------------|---------------------|-----------------------------|
|                                |                | Fair<br>(n=2)                                                | Good<br>(n=64)   | Very good<br>(n=101) | Excellent<br>(n=84) |                             |
| <b>Child health status</b>     | n (missing)    | 2 (0)                                                        | 61 (3)           | 99 (2)               | 84 (0)              | 0.0002                      |
|                                | Median (Q1–Q3) | 12.5 (0.0–25.0)                                              | 50.0 (25.0–50.0) | 25.0 (25.0–50.0)     | 25.0 (0.0–37.5)     |                             |
| <b>Headaches</b>               | n (missing)    | 2 (0)                                                        | 61 (3)           | 99 (2)               | 84 (0)              | 0.0119                      |
|                                | Median (Q1–Q3) | 25.0 (0.0–50.0)                                              | 25.0 (0.0–25.0)  | 0.0 (0.0–25.0)       | 0.0 (0.0–12.5)      |                             |
| <b>Stomach aches</b>           | n (missing)    | 2 (0)                                                        | 61 (3)           | 99 (2)               | 84 (0)              | 0.3913                      |
|                                | Median (Q1–Q3) | 37.5 (0.0–75.0)                                              | 0.0 (0.0–25.0)   | 25.0 (0.0–50.0)      | 0.0 (0.0–25.0)      |                             |
| <b>Tiredness</b>               | n (missing)    | 2 (0)                                                        | 61 (3)           | 99 (2)               | 84 (0)              | 0.3131                      |
|                                | Median (Q1–Q3) | 12.5 (0.0–25.0)                                              | 50.0 (25.0–50.0) | 25.0 (0.0–50.0)      | 25.0 (0.0–50.0)     |                             |
| <b>Lack of concentration</b>   | n (missing)    | 2 (0)                                                        | 60 (4)           | 97 (4)               | 82 (2)              | 0.2777                      |
|                                | Median (Q1–Q3) | 12.5 (0.0–25.0)                                              | 25.0 (0.0–50.0)  | 25.0 (0.0–50.0)      | 25.0 (0.0–50.0)     |                             |
| <b>Slow thinking</b>           | n (missing)    | 2 (0)                                                        | 58 (6)           | 96 (5)               | 80 (4)              | 0.0533                      |
|                                | Median (Q1–Q3) | 12.5 (0.0–25.0)                                              | 25.0 (0.0–50.0)  | 0.0 (0.0–25.0)       | 0.0 (0.0–25.0)      |                             |
| <b>Irritability</b>            | n (missing)    | 2 (0)                                                        | 61 (3)           | 99 (2)               | 84 (0)              | 0.0150                      |
|                                | Median (Q1–Q3) | 62.5 (50.0–75.0)                                             | 50.0 (25.0–75.0) | 25.0 (25.0–50.0)     | 25.0 (0.0–50.0)     |                             |
| <b>Aggressiveness</b>          | n (missing)    | 2 (0)                                                        | 59 (5)           | 98 (3)               | 82 (2)              | 0.0853                      |
|                                | Median (Q1–Q3) | 37.5 (25.0–50.0)                                             | 0.0 (0.0–25.0)   | 0.0 (0.0–25.0)       | 0.0 (0.0–25.0)      |                             |
| <b>Moodiness</b>               | n (missing)    | 2 (0)                                                        | 61 (3)           | 98 (3)               | 83 (1)              | 0.2911                      |
|                                | Median (Q1–Q3) | 12.5 (0.0–25.0)                                              | 25.0 (25.0–50.0) | 25.0 (0.0–50.0)      | 25.0 (0.0–50.0)     |                             |
| <b>Sadness</b>                 | n (missing)    | 2 (0)                                                        | 61 (3)           | 99 (2)               | 82 (2)              | 0.0013                      |
|                                | Median (Q1–Q3) | 25.0 (25.0–25.0)                                             | 25.0 (0.0–50.0)  | 25.0 (0.0–25.0)      | 0.0 (0.0–25.0)      |                             |
| <b>Anxiety</b>                 | n (missing)    | 2 (0)                                                        | 59 (5)           | 97 (4)               | 83 (1)              | 0.0658                      |
|                                | Median (Q1–Q3) | 0.0 (0.0–0.0)                                                | 0.0 (0.0–25.0)   | 0.0 (0.0–25.0)       | 0.0 (0.0–25.0)      |                             |
| <b>Emotional impact of PKU</b> | n (missing)    | 2 (0)                                                        | 61 (3)           | 98 (3)               | 84 (0)              | 0.0007                      |
|                                | Median (Q1–Q3) | 28.1 (18.8–37.5)                                             | 56.3 (31.3–75.0) | 37.5 (25.0–56.3)     | 34.4 (18.8–53.1)    |                             |
| <b>Practical impact</b>        | n (missing)    | 2 (0)                                                        | 45 (19)          | 73 (28)              | 69 (15)             | 0.0066                      |

|                                                           |                | Overall health status as rated by the clinician <sup>a</sup> |                   |                      |                     | p-value<br>(Kruskal-Wallis) |
|-----------------------------------------------------------|----------------|--------------------------------------------------------------|-------------------|----------------------|---------------------|-----------------------------|
|                                                           |                | Fair<br>(n=2)                                                | Good<br>(n=64)    | Very good<br>(n=101) | Excellent<br>(n=84) |                             |
| <b>of PKU</b>                                             | Median (Q1–Q3) | 25.4 (5.0–45.8)                                              | 16.7 (4.2–29.2)   | 12.5 (4.2–20.8)      | 5.0 (0.0–12.5)      |                             |
| <b>Social impact of PKU</b>                               | n (missing)    | 2 (0)                                                        | 59 (5)            | 95 (6)               | 83 (1)              | 0.0189                      |
|                                                           | Median (Q1–Q3) | 25.0 (10.0–40.0)                                             | 15.0 (10.0–31.3)  | 10.0 (5.0–25.0)      | 10.0 (5.0–20.0)     |                             |
| <b>Overall impact of PKU</b>                              | n (missing)    | 2 (0)                                                        | 61 (3)            | 97 (4)               | 84 (0)              | 0.0003                      |
|                                                           | Median (Q1–Q3) | 26.2 (10.7–41.7)                                             | 28.3 (17.9–41.7)  | 21.2 (10.7–33.3)     | 15.8 (8.6–26.7)     |                             |
| <b>Anxiety – blood test</b>                               | n (missing)    | 2 (0)                                                        | 61 (3)            | 97 (4)               | 82 (2)              | 0.6697                      |
|                                                           | Median (Q1–Q3) | 25.0 (25.0–25.0)                                             | 12.5 (0.0–37.5)   | 12.5 (0.0–25.0)      | 12.5 (0.0–37.5)     |                             |
| <b>Impact of child anxiety – blood test</b>               | n (missing)    | 2 (0)                                                        | 59 (5)            | 97 (4)               | 82 (2)              | 0.7835                      |
|                                                           | Median (Q1–Q3) | 25.0 (12.5–37.5)                                             | 25.0 (0.0–50.0)   | 12.5 (0.0–37.5)      | 12.5 (0.0–37.5)     |                             |
| <b>Anxiety – Phe levels</b>                               | n (missing)    | 2 (0)                                                        | 61 (3)            | 98 (3)               | 84 (0)              | 0.2060                      |
|                                                           | Median (Q1–Q3) | 50.0 (25.0–75.0)                                             | 75.0 (50.0–75.0)  | 50.0 (25.0–75.0)     | 50.0 (25.0–75.0)    |                             |
| <b>Financial impact of PKU</b>                            | n (missing)    | 2 (0)                                                        | 60 (4)            | 97 (4)               | 84 (0)              | 0.0039                      |
|                                                           | Median (Q1–Q3) | 75.0 (50.0–100.0)                                            | 25.0 (0.0–50.0)   | 25.0 (0.0–50.0)      | 0.0 (0.0–25.0)      |                             |
| <b>Information on PKU</b>                                 | n (missing)    | 2 (0)                                                        | 61 (3)            | 98 (3)               | 84 (0)              | 0.0321                      |
|                                                           | Median (Q1–Q3) | 37.5 (0.0–75.0)                                              | 25.0 (25.0–50.0)  | 25.0 (25.0–50.0)     | 25.0 (0.0–37.5)     |                             |
| <b>Adherence to supplements</b>                           | n (missing)    | 2 (0)                                                        | 55 (9)            | 88 (13)              | 70 (14)             | 0.2241                      |
|                                                           | Median (Q1–Q3) | 0.0 (0.0–0.0)                                                | 0.0 (0.0–25.0)    | 0.0 (0.0–25.0)       | 0.0 (0.0–25.0)      |                             |
| <b>Management of supplements</b>                          | n (missing)    | 2 (0)                                                        | 55 (9)            | 89 (12)              | 71 (13)             | 0.1802                      |
|                                                           | Median (Q1–Q3) | 37.5 (25.0–50.0)                                             | 0.0 (0.0–25.0)    | 0.0 (0.0–50.0)       | 0.0 (0.0–25.0)      |                             |
| <b>Practical impact of supplements</b>                    | n (missing)    | 2 (0)                                                        | 55 (9)            | 89 (12)              | 69 (15)             | 0.3529                      |
|                                                           | Median (Q1–Q3) | 25.0 (16.7–33.3)                                             | 8.3 (0.0–33.3)    | 16.7 (0.0–33.3)      | 8.3 (0.0–33.3)      |                             |
| <b>Guilt if poor adherence to supplements</b>             | n (missing)    | 2 (0)                                                        | 52 (12)           | 89 (12)              | 69 (15)             | 0.6966                      |
|                                                           | Median (Q1–Q3) | 62.5 (25.0–100.0)                                            | 50.0 (25.0–100.0) | 50.0 (25.0–75.0)     | 50.0 (25.0–75.0)    |                             |
| <b>Relationships within family because of supplements</b> | n (missing)    | 2 (0)                                                        | 56 (8)            | 89 (12)              | 68 (16)             | 0.2459                      |
|                                                           | Median (Q1–Q3) | 12.5 (0.0–25.0)                                              | 0.0 (0.0–25.0)    | 25.0 (0.0–50.0)      | 0.0 (0.0–25.0)      |                             |
| <b>Adherence to dietary protein restriction</b>           | n (missing)    | 2 (0)                                                        | 55 (9)            | 91 (10)              | 70 (14)             | 0.0011                      |
|                                                           | Median (Q1–Q3) | 12.5 (0.0–25.0)                                              | 0.0 (0.0–25.0)    | 0.0 (0.0–25.0)       | 0.0 (0.0–0.0)       |                             |
| <b>Management of dietary protein restriction</b>          | n (missing)    | 2 (0)                                                        | 56 (8)            | 92 (9)               | 70 (14)             | 0.0484                      |
|                                                           | Median (Q1–Q3) | 37.5 (25.0–50.0)                                             | 25.0 (12.5–47.9)  | 16.7 (4.2–37.5)      | 16.7 (4.2–33.3)     |                             |
| <b>Practical impact of dietary protein restriction</b>    | n (missing)    | 2 (0)                                                        | 55 (9)            | 88 (13)              | 63 (21)             | 0.8604                      |
|                                                           | Median (Q1–Q3) | 34.5 (33.3–35.7)                                             | 32.1 (17.9–50.0)  | 30.4 (17.3–46.4)     | 28.6 (10.7–46.4)    |                             |
| <b>Food enjoyment</b>                                     | n (missing)    | 2 (0)                                                        | 56 (8)            | 91 (10)              | 67 (17)             | 0.8996                      |
|                                                           | Median (Q1–Q3) | 12.5 (0.0–25.0)                                              | 25.0 (0.0–25.0)   | 0.0 (0.0–25.0)       | 25.0 (0.0–25.0)     |                             |

|                                                          |                | Overall health status as rated by the clinician <sup>a</sup> |                  |                      |                     | p-value<br>(Kruskal-Wallis) |
|----------------------------------------------------------|----------------|--------------------------------------------------------------|------------------|----------------------|---------------------|-----------------------------|
|                                                          |                | Fair<br>(n=2)                                                | Good<br>(n=64)   | Very good<br>(n=101) | Excellent<br>(n=84) |                             |
| <b>Guilt if dietary protein restriction not followed</b> | n (missing)    | 2 (0)                                                        | 53 (11)          | 92 (9)               | 71 (13)             | 0.7164                      |
|                                                          | Median (Q1–Q3) | 50.0 (25.0–75.0)                                             | 50.0 (25.0–75.0) | 50.0 (25.0–75.0)     | 25.0 (0.0 – 75.0)   |                             |

Phe: phenylalanine; PKU: phenylketonuria; Q: quartile; QOL: quality of life.

<sup>a</sup>Modality Poor (n=0).

**Table 5-2 - Clinical validity of the Parent PKU-QOL Questionnaire: comparison of PKU-QOL scores according to severity of PKU defined by Phe levels at diagnosis in the parent evaluable population (n=253)**

*Scores of 0 indicate no impact (or no symptom for symptom scores), scores of 25 indicate a mild impact (or rare symptoms), scores of 50 indicate a moderate impact (or occasional symptoms), scores of 75 indicate major impact (or frequent symptom), scores of 100 indicate extremely severe impact (or very frequent symptoms)*

|                                   |                | Severity of PKU                                                |                                                        | p-value<br>(Mann-Whitney<br>/Wilcoxon) |
|-----------------------------------|----------------|----------------------------------------------------------------|--------------------------------------------------------|----------------------------------------|
|                                   |                | Mild-moderate PKU<br>(Phe level: 600-1200<br>µmol/L)<br>(n=75) | Classic PKU<br>(Phe level: >1200<br>µmol/L)<br>(n=172) |                                        |
| <b>Parent-rated health status</b> | n (missing)    | 75 (0)                                                         | 167 (5)                                                | 0.0095                                 |
|                                   | Median (Q1–Q3) | 25.0 (0.0–50.0)                                                | 25.0 (25.0–50.0)                                       |                                        |
| <b>Headaches</b>                  | n (missing)    | 75 (0)                                                         | 167 (5)                                                | 0.2009                                 |
|                                   | Median (Q1–Q3) | 0.0 (0.0–25.0)                                                 | 0.0 (0.0–25.0)                                         |                                        |
| <b>Stomach aches</b>              | n (missing)    | 75 (0)                                                         | 167 (5)                                                | 0.4817                                 |
|                                   | Median (Q1–Q3) | 0.0 (0.0–50.0)                                                 | 0.0 (0.0–25.0)                                         |                                        |
| <b>Tiredness</b>                  | n (missing)    | 75 (0)                                                         | 167 (5)                                                | 0.7532                                 |
|                                   | Median (Q1–Q3) | 25.0 (0.0–50.0)                                                | 25.0 (0.0–50.0)                                        |                                        |
| <b>Lack of concentration</b>      | n (missing)    | 74 (1)                                                         | 163 (9)                                                | 0.6341                                 |
|                                   | Median (Q1–Q3) | 25.0 (0.0–50.0)                                                | 25.0 (0.0–50.0)                                        |                                        |
| <b>Slow thinking</b>              | n (missing)    | 73 (2)                                                         | 159 (13)                                               | 0.3372                                 |
|                                   | Median (Q1–Q3) | 0.0 (0.0–25.0)                                                 | 0.0 (0.0–50.0)                                         |                                        |
| <b>Irritability</b>               | n (missing)    | 75 (0)                                                         | 167 (5)                                                | 0.0531                                 |
|                                   | Median (Q1–Q3) | 25.0 (0.0–50.0)                                                | 50.0 (25.0–50.0)                                       |                                        |
| <b>Aggressiveness</b>             | n (missing)    | 73 (2)                                                         | 164 (8)                                                | 0.6625                                 |
|                                   | Median (Q1–Q3) | 0.0 (0.0–25.0)                                                 | 0.0 (0.0–25.0)                                         |                                        |
| <b>Moodiness</b>                  | n (missing)    | 74 (1)                                                         | 166 (6)                                                | 0.9882                                 |
|                                   | Median (Q1–Q3) | 25.0 (0.0–50.0)                                                | 25.0 (0.0–50.0)                                        |                                        |
| <b>Sadness</b>                    | n (missing)    | 73 (2)                                                         | 167 (5)                                                | 0.2872                                 |
|                                   | Median (Q1–Q3) | 0.0 (0.0–25.0)                                                 | 25.0 (0.0–25.0)                                        |                                        |
| <b>Anxiety</b>                    | n (missing)    | 73 (2)                                                         | 164 (8)                                                | 0.6344                                 |
|                                   | Median (Q1–Q3) | 0.0 (0.0–25.0)                                                 | 0.0 (0.0–25.0)                                         |                                        |
| <b>Emotional impact of PKU</b>    | n (missing)    | 74 (1)                                                         | 167 (5)                                                | 0.0231                                 |
|                                   | Median (Q1–Q3) | 34.4 (18.8–56.3)                                               | 43.8 (25.0–62.5)                                       |                                        |
| <b>Practical impact of PKU</b>    | n (missing)    | 59 (16)                                                        | 126 (46)                                               | 0.0034                                 |
|                                   | Median (Q1–Q3) | 5.0 (0.0–16.7)                                                 | 12.5 (4.2–25.0)                                        |                                        |

|                                                           |                | Severity of PKU                                                |                                                        | p-value<br>(Mann-Whitney<br>/Wilcoxon) |
|-----------------------------------------------------------|----------------|----------------------------------------------------------------|--------------------------------------------------------|----------------------------------------|
|                                                           |                | Mild-moderate PKU<br>(Phe level: 600-1200<br>µmol/L)<br>(n=75) | Classic PKU<br>(Phe level: >1200<br>µmol/L)<br>(n=172) |                                        |
| <b>Social impact of PKU</b>                               | n (missing)    | 72 (3)                                                         | 163 (9)                                                | 0.1628                                 |
|                                                           | Median (Q1–Q3) | 10.0 (5.0–20.0)                                                | 15.0 (5.0–25.0)                                        |                                        |
| <b>Overall impact of PKU</b>                              | n (missing)    | 73 (2)                                                         | 167 (5)                                                | 0.0035                                 |
|                                                           | Median (Q1–Q3) | 18.3 (8.3–26.7)                                                | 23.2 (12.5–36.5)                                       |                                        |
| <b>Anxiety – blood test</b>                               | n (missing)    | 73 (2)                                                         | 165 (7)                                                | 0.1435                                 |
|                                                           | Median (Q1–Q3) | 12.5 (0.0–25.0)                                                | 12.5 (0.0–37.5)                                        |                                        |
| <b>Impact of child anxiety – blood test</b>               | n (missing)    | 73 (2)                                                         | 163 (9)                                                | 0.4306                                 |
|                                                           | Median (Q1–Q3) | 12.5 (0.0–37.5)                                                | 12.5 (0.0–37.5)                                        |                                        |
| <b>Anxiety – Phe levels</b>                               | n (missing)    | 74 (1)                                                         | 167 (5)                                                | 0.3518                                 |
|                                                           | Median (Q1–Q3) | 50.0 (25.0–75.0)                                               | 50.0 (25.0–75.0)                                       |                                        |
| <b>Financial impact of PKU</b>                            | n (missing)    | 73 (2)                                                         | 166 (6)                                                | 0.0028                                 |
|                                                           | Median (Q1–Q3) | 0.0 (0.0–25.0)                                                 | 25.0 (0.0–50.0)                                        |                                        |
| <b>Information on PKU</b>                                 | n (missing)    | 74 (1)                                                         | 167 (5)                                                | 0.3909                                 |
|                                                           | Median (Q1–Q3) | 25.0 (25.0–50.0)                                               | 25.0 (25.0–50.0)                                       |                                        |
| <b>Adherence to supplements</b>                           | n (missing)    | 49 (26)                                                        | 163 (9)                                                | 0.8713                                 |
|                                                           | Median (Q1–Q3) | 0.0 (0.0–25.0)                                                 | 0.0 (0.0–25.0)                                         |                                        |
| <b>Management of supplements</b>                          | n (missing)    | 49 (26)                                                        | 165 (7)                                                | 0.6052                                 |
|                                                           | Median (Q1–Q3) | 0.0 (0.0–25.0)                                                 | 0.0 (0.0–25.0)                                         |                                        |
| <b>Practical impact of supplements</b>                    | n (missing)    | 49 (26)                                                        | 163 (9)                                                | 0.0409                                 |
|                                                           | Median (Q1–Q3) | 8.3 (0.0–16.7)                                                 | 16.7 (0.0–41.7)                                        |                                        |
| <b>Guilt if poor adherence to supplements</b>             | n (missing)    | 50 (25)                                                        | 159 (13)                                               | 0.8627                                 |
|                                                           | Median (Q1–Q3) | 50.0 (25.0–75.0)                                               | 50.0 (25.0–75.0)                                       |                                        |
| <b>Relationships within family because of supplements</b> | n (missing)    | 49 (26)                                                        | 163 (9)                                                | 0.7388                                 |
|                                                           | Median (Q1–Q3) | 0.0 (0.0–25.0)                                                 | 0.0 (0.0–25.0)                                         |                                        |
| <b>Adherence to dietary protein restriction</b>           | n (missing)    | 52 (23)                                                        | 163 (9)                                                | 0.0982                                 |
|                                                           | Median (Q1–Q3) | 0.0 (0.0–0.0)                                                  | 0.0 (0.0–25.0)                                         |                                        |
| <b>Management of dietary protein restriction</b>          | n (missing)    | 52 (23)                                                        | 165 (7)                                                | 0.0987                                 |
|                                                           | Median (Q1–Q3) | 16.7 (4.2–29.2)                                                | 20.8 (8.3–41.7)                                        |                                        |
| <b>Practical impact of dietary protein restriction</b>    | n (missing)    | 43 (32)                                                        | 162 (10)                                               | 0.0695                                 |
|                                                           | Median (Q1–Q3) | 28.6 (10.7–37.5)                                               | 32.7 (16.7–50.0)                                       |                                        |
| <b>Food enjoyment</b>                                     | n (missing)    | 49 (26)                                                        | 164 (8)                                                | 0.0032                                 |
|                                                           | Median (Q1–Q3) | 0.0 (0.0–25.0)                                                 | 25.0 (0.0–37.5)                                        |                                        |
| <b>Guilt if dietary protein restriction not followed</b>  | n (missing)    | 54 (21)                                                        | 161 (11)                                               | 0.4313                                 |
|                                                           | Median (Q1–Q3) | 25.0 (25.0–50.0)                                               | 50.0 (25.0–75.0)                                       |                                        |

Phe: phenylalanine; PKU: phenylketonuria; Q: quartile; QOL: quality of life.
