# Supplementary material for: Development and psychometric validation of measures to assess the impact of phenylketonuria and its dietary treatment on patients’ and parents’ quality of life: the phenylketonuria – quality of life (PKU-QOL) questionnaires
Source: Springer Nature journal article supplement (doi:10.1186/s13023-015-0261-6), 2015-05-09
Supplement: MOESM4 [file 9776110]

## Additional file 04

### Clinical validity of the Adult PKU-QOL questionnaire

**Table 4-1 - Clinical validity of the Adult PKU-QOL questionnaire: comparison of PKU-QOL scores according to patient overall health status as rated by the clinician in the adult evaluable population (n=104)**

Scores of 0 indicate no impact (or no symptom for symptom scores), scores of 25 indicate a mild impact (or rare symptoms), scores of 50 indicate a moderate impact (or occasional symptoms), scores of 75 indicate major impact (or frequent symptom), scores of 100 indicate extremely severe impact (or very frequent symptoms)

|                                 |                | Overall assessment of health status by the clinician <sup>a</sup> |                  |                     |                     | p-value<br>(Kruskal-Wallis) |
|---------------------------------|----------------|-------------------------------------------------------------------|------------------|---------------------|---------------------|-----------------------------|
|                                 |                | Fair<br>(n=3)                                                     | Good<br>(n=28)   | Very good<br>(n=46) | Excellent<br>(n=26) |                             |
| <b>Self-rated health status</b> | n (missing)    | 3 (0)                                                             | 27 (1)           | 46 (0)              | 26 (0)              | 0.0003                      |
|                                 | Median (Q1–Q3) | 50.0 (50.0–100.0)                                                 | 50.0 (25.0–50.0) | 25.0 (25.0–50.0)    | 25.0 (0.0–50.0)     |                             |
| <b>Headaches</b>                | n (missing)    | 3 (0)                                                             | 26 (2)           | 46 (0)              | 26 (0)              | 0.3947                      |
|                                 | Median (Q1–Q3) | 50.0 (0.0–50.0)                                                   | 25.0 (0.0–50.0)  | 0.0 (0.0–25.0)      | 12.5 (0.0–25.0)     |                             |
| <b>Stomach aches</b>            | n (missing)    | 3 (0)                                                             | 26 (2)           | 46 (0)              | 26 (0)              | 0.0126                      |
|                                 | Median (Q1–Q3) | 50.0 (25.0–75.0)                                                  | 12.5 (0.0–50.0)  | 0.0 (0.0–25.0)      | 0.0 (0.0–0.0)       |                             |
| <b>Tiredness</b>                | n (missing)    | 3 (0)                                                             | 26 (2)           | 46 (0)              | 26 (0)              | 0.4790                      |
|                                 | Median (Q1–Q3) | 50.0 (25.0–50.0)                                                  | 50.0 (25.0–75.0) | 50.0 (25.0–50.0)    | 37.5 (25.0–50.0)    |                             |
| <b>Lack of concentration</b>    | n (missing)    | 3 (0)                                                             | 26 (2)           | 46 (0)              | 26 (0)              | 0.1596                      |
|                                 | Median (Q1–Q3) | 25.0 (25.0–50.0)                                                  | 25.0 (0.0–50.0)  | 25.0 (0.0–50.0)     | 0.0 (0.0–25.0)      |                             |
| <b>Slow thinking</b>            | n (missing)    | 3 (0)                                                             | 26 (2)           | 46 (0)              | 26 (0)              | 0.0377                      |
|                                 | Median (Q1–Q3) | 25.0 (0.0–50.0)                                                   | 25.0 (0.0–50.0)  | 0.0 (0.0–25.0)      | 0.0 (0.0–0.0)       |                             |
| <b>Trembling hands</b>          | n (missing)    | 3 (0)                                                             | 26 (2)           | 46 (0)              | 26 (0)              | 0.5172                      |
|                                 | Median (Q1–Q3) | 0.0 (0.0–50.0)                                                    | 0.0 (0.0–25.0)   | 0.0 (0.0–0.0)       | 0.0 (0.0–25.0)      |                             |
| <b>Irritability</b>             | n (missing)    | 3 (0)                                                             | 27 (1)           | 46 (0)              | 26 (0)              | 0.0499                      |
|                                 | Median (Q1–Q3) | 75.0 (50.0–75.0)                                                  | 50.0 (0.0–50.0)  | 50.0 (25.0–50.0)    | 25.0 (0.0–50.0)     |                             |
| <b>Aggressiveness</b>           | n (missing)    | 3 (0)                                                             | 26 (2)           | 46 (0)              | 26 (0)              | 0.2428                      |
|                                 | Median (Q1–Q3) | 50.0 (0.0–75.0)                                                   | 0.0 (0.0–25.0)   | 0.0 (0.0–25.0)      | 0.0 (0.0–25.0)      |                             |
| <b>Moodiness</b>                | n (missing)    | 3 (0)                                                             | 26 (2)           | 46 (0)              | 26 (0)              | 0.2972                      |
|                                 | Median (Q1–Q3) | 50.0 (0.0–50.0)                                                   | 25.0 (0.0–50.0)  | 25.0 (0.0–50.0)     | 0.0 (0.0–25.0)      |                             |
| <b>Sadness</b>                  | n (missing)    | 3 (0)                                                             | 26 (2)           | 46 (0)              | 26 (0)              | 0.0437                      |
|                                 | Median (Q1–Q3) | 50.0 (25.0–75.0)                                                  | 50.0 (0.0–75.0)  | 25.0 (0.0–50.0)     | 0.0 (0.0–50.0)      |                             |
| <b>Anxiety</b>                  | n (missing)    | 3 (0)                                                             | 26 (2)           | 46 (0)              | 26 (0)              | 0.1295                      |
|                                 | Median (Q1–Q3) | 75.0 (0.0–75.0)                                                   | 12.5 (0.0–50.0)  | 0.0 (0.0–25.0)      | 25.0 (0.0–50.0)     |                             |

|                                                           |                | Overall assessment of health status by the clinician <sup>a</sup> |                    |                     |                     | p-value<br>(Kruskal-Wallis) |
|-----------------------------------------------------------|----------------|-------------------------------------------------------------------|--------------------|---------------------|---------------------|-----------------------------|
|                                                           |                | Fair<br>(n=3)                                                     | Good<br>(n=28)     | Very good<br>(n=46) | Excellent<br>(n=26) |                             |
| <b>Emotional impact of PKU</b>                            | n (missing)    | 3 (0)                                                             | 27 (1)             | 46 (0)              | 26 (0)              | <0.0001                     |
|                                                           | Median (Q1–Q3) | 55.0 (45.0–65.0)                                                  | 60.0 (45.0–70.0)   | 45.0 (25.0–55.0)    | 30.0 (20.0–40.0)    |                             |
| <b>Practical impact of PKU</b>                            | n (missing)    | 3 (0)                                                             | 26 (2)             | 43 (3)              | 26 (0)              | 0.0231                      |
|                                                           | Median (Q1–Q3) | 18.8 (8.3–37.5)                                                   | 25.0 (6.3–37.5)    | 16.7 (8.3–25.0)     | 6.3 (0.0–12.5)      |                             |
| <b>Social impact of PKU</b>                               | n (missing)    | 3 (0)                                                             | 27 (1)             | 46 (0)              | 26 (0)              | 0.1726                      |
|                                                           | Median (Q1–Q3) | 12.5 (8.3–62.5)                                                   | 18.8 (6.3–37.5)    | 14.6 (6.3–25.0)     | 10.4 (6.3–18.8)     |                             |
| <b>Overall impact of PKU</b>                              | n (missing)    | 2 (1)                                                             | 17 (11)            | 26 (20)             | 14 (12)             | 0.0039                      |
|                                                           | Median (Q1–Q3) | 41.7 (31.3–52.1)                                                  | 39.6 (29.2–45.8)   | 27.1 (18.8–37.5)    | 17.7 (12.5–27.1)    |                             |
| <b>Anxiety – blood test</b>                               | n (missing)    | 2 (1)                                                             | 23 (5)             | 44 (2)              | 24 (2)              | 0.2178                      |
|                                                           | Median (Q1–Q3) | 18.8 (12.5–25.0)                                                  | 0.0 (0.0–0.0)      | 0.0 (0.0–12.5)      | 0.0 (0.0–12.5)      |                             |
| <b>Anxiety – Phe levels</b>                               | n (missing)    | 3 (0)                                                             | 27 (1)             | 46 (0)              | 26 (0)              | 0.1703                      |
|                                                           | Median (Q1–Q3) | 75.0 (50.0–100.0)                                                 | 25.0 (0.0–50.0)    | 25.0 (25.0–50.0)    | 25.0 (25.0–75.0)    |                             |
| <b>Anxiety – Phe levels during pregnancy</b>              | n (missing)    | 3 (0)                                                             | 13 (15)            | 32 (14)             | 16 (10)             | 0.0921                      |
|                                                           | Median (Q1–Q3) | 25.0 (0.0–75.0)                                                   | 100.0 (75.0–100.0) | 100.0 (75.0–100.0)  | 100.0 (50.0–100.0)  |                             |
| <b>Financial impact of PKU</b>                            | n (missing)    | 3 (0)                                                             | 27 (1)             | 46 (0)              | 26 (0)              | 0.0350                      |
|                                                           | Median (Q1–Q3) | 25.0 (0.0–100.0)                                                  | 25.0 (0.0–50.0)    | 0.0 (0.0–25.0)      | 0.0 (0.0–25.0)      |                             |
| <b>Information on PKU</b>                                 | n (missing)    | 3 (0)                                                             | 27 (1)             | 46 (0)              | 26 (0)              | 0.2653                      |
|                                                           | Median (Q1–Q3) | 50.0 (0.0–100.0)                                                  | 50.0 (25.0–50.0)   | 25.0 (25.0–50.0)    | 25.0 (25.0–50.0)    |                             |
| <b>Adherence to supplements</b>                           | n (missing)    | 2 (1)                                                             | 19 (9)             | 32 (14)             | 18 (8)              | 0.9908                      |
|                                                           | Median (Q1–Q3) | 16.7 (8.3–25.0)                                                   | 16.7 (8.3–33.3)    | 16.7 (4.2–33.3)     | 8.3 (0.0–41.7)      |                             |
| <b>Practical impact of supplements</b>                    | n (missing)    | 3 (0)                                                             | 21 (7)             | 37 (9)              | 20 (6)              | 0.0327                      |
|                                                           | Median (Q1–Q3) | 68.8 (37.5–75.0)                                                  | 18.8 (6.3–37.5)    | 18.8 (0.0–37.5)     | 12.5 (0.0–31.3)     |                             |
| <b>Guilt if poor adherence to supplements</b>             | n (missing)    | 3 (0)                                                             | 23 (5)             | 37 (9)              | 18 (8)              | 0.9693                      |
|                                                           | Median (Q1–Q3) | 25.0 (0.0–100.0)                                                  | 50.0 (25.0–75.0)   | 50.0 (25.0–75.0)    | 50.0 (25.0–75.0)    |                             |
| <b>Relationships within family because of supplements</b> | n (missing)    | 3 (0)                                                             | 22 (6)             | 37 (9)              | 20 (6)              | 0.6335                      |
|                                                           | Median (Q1–Q3) | 0.0 (0.0–25.0)                                                    | 0.0 (0.0–0.0)      | 0.0 (0.0–25.0)      | 0.0 (0.0–25.0)      |                             |
| <b>Taste – supplements</b>                                | n (missing)    | 3 (0)                                                             | 21 (7)             | 37 (9)              | 19 (7)              | 0.5430                      |
|                                                           | Median (Q1–Q3) | 50.0 (50.0–75.0)                                                  | 50.0 (25.0–75.0)   | 50.0 (25.0–50.0)    | 50.0 (25.0–75.0)    |                             |
| <b>Food temptations</b>                                   | n (missing)    | 3 (0)                                                             | 24 (4)             | 38 (8)              | 19 (7)              | 0.0377                      |
|                                                           | Median (Q1–Q3) | 50.0 (37.5–62.5)                                                  | 50.0 (25.0–62.5)   | 43.8 (12.5–50.0)    | 25.0 (0.0–50.0)     |                             |
| <b>Adherence to dietary protein restriction</b>           | n (missing)    | 2 (1)                                                             | 22 (6)             | 36 (10)             | 19 (7)              | 0.6712                      |
|                                                           | Median (Q1–Q3) | 12.5 (0.0–25.0)                                                   | 18.8 (6.3–30.0)    | 22.5 (0.0–35.0)     | 10.0 (0.0–30.0)     |                             |
| <b>Social impact of dietary protein restriction</b>       | n (missing)    | 3 (0)                                                             | 23 (5)             | 28 (8)              | 20 (6)              | 0.0643                      |
|                                                           | Median (Q1–Q3) | 58.3 (16.7–79.2)                                                  | 16.7 (8.3–35.0)    | 11.3 (4.2–20.8)     | 8.3 (0.0–20.8)      |                             |

|                                                                 |                | Overall assessment of health status by the clinician <sup>a</sup> |                  |                     |                     | p-value<br>(Kruskal-Wallis) |
|-----------------------------------------------------------------|----------------|-------------------------------------------------------------------|------------------|---------------------|---------------------|-----------------------------|
|                                                                 |                | Fair<br>(n=3)                                                     | Good<br>(n=28)   | Very good<br>(n=46) | Excellent<br>(n=26) |                             |
| <b>Practical impact of dietary protein restriction</b>          | n (missing)    | 3 (0)                                                             | 22 (6)           | 32 (14)             | 15 (11)             | 0.0789                      |
|                                                                 | Median (Q1–Q3) | 71.4 (46.4–75.0)                                                  | 39.6 (21.4–54.2) | 30.4 (21.4–48.2)    | 32.1 (12.5–57.1)    |                             |
| <b>Overall impact of dietary protein restriction</b>            | n (missing)    | 3 (0)                                                             | 22 (6)           | 34 (12)             | 17 (9)              | 0.0631                      |
|                                                                 | Median (Q1–Q3) | 67.3 (32.7–75.0)                                                  | 27.1 (18.8–40.0) | 22.8 (11.5–35.4)    | 20.8 (6.8–32.7)     |                             |
| <b>Taste – low-protein food</b>                                 | n (missing)    | 3 (0)                                                             | 19 (9)           | 32 (14)             | 14 (12)             | 0.1245                      |
|                                                                 | Median (Q1–Q3) | 50.0 (50.0–75.0)                                                  | 25.0 (25.0–50.0) | 25.0 (25.0–37.5)    | 25.0 (25.0–50.0)    |                             |
| <b>Food enjoyment</b>                                           | n (missing)    | 3 (0)                                                             | 23 (5)           | 38 (8)              | 19 (7)              | 0.3347                      |
|                                                                 | Median (Q1–Q3) | 75.0 (0.0–100.0)                                                  | 25.0 (0.0–50.0)  | 25.0 (0.0–50.0)     | 25.0 (0.0–50.0)     |                             |
| <b>Guilt if dietary protein restriction not followed</b>        | n (missing)    | 3 (0)                                                             | 22 (6)           | 38 (8)              | 20 (6)              | 0.8542                      |
|                                                                 | Median (Q1–Q3) | 25.0 (25.0–100.0)                                                 | 50.0 (25.0–75.0) | 50.0 (25.0–100.0)   | 50.0 (25.0–75.0)    |                             |
| <b>Overall difficulty following dietary protein restriction</b> | n (missing)    | 3 (0)                                                             | 23 (5)           | 39 (7)              | 19 (7)              | 0.3826                      |
|                                                                 | Median (Q1–Q3) | 50.0 (0.0–75.0)                                                   | 25.0 (0.0–50.0)  | 25.0 (0.0–50.0)     | 25.0 (0.0–50.0)     |                             |

Phe: phenylalanine; PKU: phenylketonuria; Q: quartile; QOL: quality of life.

<sup>a</sup>Modality Poor (n=0).

**Table 4-2 - Clinical validity of the Adult PKU-QoL questionnaire: comparison of PKU-QoL scores according to severity of PKU defined by Phe levels at diagnosis in the adult evaluable population (n=104)**

*Scores of 0 indicate no impact (or no symptom for symptom scores), scores of 25 indicate a mild impact (or rare symptoms), scores of 50 indicate a moderate impact (or occasional symptoms), scores of 75 indicate major impact (or frequent symptom), scores of 100 indicate extremely severe impact (or very frequent symptoms)*

|                                 |                | Severity of PKU                                                |                                                       |                                        |
|---------------------------------|----------------|----------------------------------------------------------------|-------------------------------------------------------|----------------------------------------|
|                                 |                | Mild-moderate PKU<br>(Phe level: 600-1200<br>µmol/L)<br>(n=37) | Classic PKU<br>(Phe level: >1200<br>µmol/L)<br>(n=67) | p-value<br>(Mann-Whitney<br>/Wilcoxon) |
| <b>Self-rated health status</b> | n (missing)    | 36 (1)                                                         | 67 (0)                                                | 0.3698                                 |
|                                 | Median (Q1–Q3) | 50.0 (25.0–50.0)                                               | 25.0 (25.0–50.0)                                      |                                        |
| <b>Headaches</b>                | n (missing)    | 36 (1)                                                         | 66 (1)                                                | 0.4257                                 |
|                                 | Median (Q1–Q3) | 25.0 (0.0–50.0)                                                | 12.5 (0.0–25.0)                                       |                                        |
| <b>Stomach aches</b>            | n (missing)    | 36 (1)                                                         | 66 (1)                                                | 0.3965                                 |
|                                 | Median (Q1–Q3) | 0.0 (0.0–37.5)                                                 | 0.0 (0.0–25.0)                                        |                                        |
| <b>Tiredness</b>                | n (missing)    | 36 (1)                                                         | 66 (1)                                                | 0.9446                                 |
|                                 | Median (Q1–Q3) | 50.0 (25.0–50.0)                                               | 50.0 (25.0–50.0)                                      |                                        |
| <b>Lack of concentration</b>    | n (missing)    | 36 (1)                                                         | 66 (1)                                                | 0.8232                                 |
|                                 | Median (Q1–Q3) | 25.0 (0.0–50.0)                                                | 25.0 (0.0–50.0)                                       |                                        |
| <b>Slow thinking</b>            | n (missing)    | 36 (1)                                                         | 66 (1)                                                | 0.2678                                 |
|                                 | Median (Q1–Q3) | 0.0 (0.0–25.0)                                                 | 0.0 (0.0–25.0)                                        |                                        |
| <b>Trembling hands</b>          | n (missing)    | 36 (1)                                                         | 66 (1)                                                | 0.9893                                 |
|                                 | Median (Q1–Q3) | 0.0 (0.0–25.0)                                                 | 0.0 (0.0–25.0)                                        |                                        |
| <b>Irritability</b>             | n (missing)    | 36 (1)                                                         | 67 (0)                                                | 0.7517                                 |
|                                 | Median (Q1–Q3) | 37.5 (0.0–50.0)                                                | 25.0 (25.0–50.0)                                      |                                        |
| <b>Aggressiveness</b>           | n (missing)    | 36 (1)                                                         | 66 (1)                                                | 0.6881                                 |
|                                 | Median (Q1–Q3) | 0.0 (0.0–25.0)                                                 | 0.0 (0.0–25.0)                                        |                                        |
| <b>Moodiness</b>                | n (missing)    | 36 (1)                                                         | 66 (1)                                                | 0.9192                                 |
|                                 | Median (Q1–Q3) | 25.0 (0.0–50.0)                                                | 25.0 (0.0–50.0)                                       |                                        |
| <b>Sadness</b>                  | n (missing)    | 36 (1)                                                         | 66 (1)                                                | 0.7331                                 |
|                                 | Median (Q1–Q3) | 25.0 (0.0–50.0)                                                | 25.0 (0.0–50.0)                                       |                                        |
| <b>Anxiety</b>                  | n (missing)    | 36 (1)                                                         | 66 (1)                                                | 0.1801                                 |
|                                 | Median (Q1–Q3) | 25.0 (0.0–50.0)                                                | 0.0 (0.0–25.0)                                        |                                        |
| <b>Emotional impact of PKU</b>  | n (missing)    | 36 (1)                                                         | 67 (0)                                                | 0.5859                                 |
|                                 | Median (Q1–Q3) | 45.0 (25.0–60.0)                                               | 45.0 (30.0–65.0)                                      |                                        |

|                                                           |                | Severity of PKU                                                |                                                       |                                        |
|-----------------------------------------------------------|----------------|----------------------------------------------------------------|-------------------------------------------------------|----------------------------------------|
|                                                           |                | Mild-moderate PKU<br>(Phe level: 600-1200<br>µmol/L)<br>(n=37) | Classic PKU<br>(Phe level: >1200<br>µmol/L)<br>(n=67) | p-value<br>(Mann-Whitney<br>/Wilcoxon) |
| <b>Practical impact of PKU</b>                            | n (missing)    | 33 (4)                                                         | 66 (1)                                                | 0.3205                                 |
|                                                           | Median (Q1–Q3) | 8.3 (0.0–25.0)                                                 | 16.7 (6.3–31.3)                                       |                                        |
| <b>Social impact of PKU</b>                               | n (missing)    | 36 (1)                                                         | 67 (0)                                                | 0.2991                                 |
|                                                           | Median (Q1–Q3) | 12.5 (6.3–18.8)                                                | 16.7 (6.3 – 25.0)                                     |                                        |
| <b>Overall impact of PKU</b>                              | n (missing)    | 16 (21)                                                        | 44 (23)                                               | 0.3793                                 |
|                                                           | Median (Q1–Q3) | 25.0 (17.7–32.3)                                               | 28.1 (18.8–41.7)                                      |                                        |
| <b>Anxiety – blood test</b>                               | n (missing)    | 33 (4)                                                         | 61 (6)                                                | 0.2108                                 |
|                                                           | Median (Q1–Q3) | 0.0 (0.0–25.0)                                                 | 0.0 (0.0–12.5)                                        |                                        |
| <b>Anxiety – Phe levels</b>                               | n (missing)    | 36 (1)                                                         | 67 (0)                                                | 0.9142                                 |
|                                                           | Median (Q1–Q3) | 25.0 (25.0–50.0)                                               | 25.0 (25.0–50.0)                                      |                                        |
| <b>Anxiety – Phe levels during pregnancy</b>              | n (missing)    | 23 (14)                                                        | 42 (25)                                               | 0.2571                                 |
|                                                           | Median (Q1–Q3) | 75.0 (50.0–100.0)                                              | 100.0 (75.0–100.0)                                    |                                        |
| <b>Financial impact of PKU</b>                            | n (missing)    | 36 (1)                                                         | 67 (0)                                                | 0.0174                                 |
|                                                           | Median (Q1–Q3) | 0.0 (0.0–25.0)                                                 | 25.0 (0.0–50.0)                                       |                                        |
| <b>Information on PKU</b>                                 | n (missing)    | 36 (1)                                                         | 67 (0)                                                | 0.7770                                 |
|                                                           | Median (Q1–Q3) | 25.0 (25.0–50.0)                                               | 25.0 (25.0–50.0)                                      |                                        |
| <b>Adherence to supplements</b>                           | n (missing)    | 17 (20)                                                        | 55 (12)                                               | 0.6323                                 |
|                                                           | Median (Q1–Q3) | 8.3 (0.0–25.0)                                                 | 16.7 (0.0–33.3)                                       |                                        |
| <b>Practical impact of supplements</b>                    | n (missing)    | 19 (18)                                                        | 63 (4)                                                | 0.8370                                 |
|                                                           | Median (Q1–Q3) | 12.5 (6.3–31.3)                                                | 18.8 (0.0–37.5)                                       |                                        |
| <b>Guilt if poor adherence to supplements</b>             | n (missing)    | 19 (18)                                                        | 63 (4)                                                | 0.9776                                 |
|                                                           | Median (Q1–Q3) | 50.0 (25.0–75.0)                                               | 50.0 (25.0–75.0)                                      |                                        |
| <b>Relationships within family because of supplements</b> | n (missing)    | 19 (18)                                                        | 64 (3)                                                | 0.2339                                 |
|                                                           | Median (Q1–Q3) | 0.0 (0.0–0.0)                                                  | 0.0 (0.0–25.0)                                        |                                        |
| <b>Taste – supplements</b>                                | n (missing)    | 19 (18)                                                        | 62 (5)                                                | 0.8918                                 |
|                                                           | Median (Q1–Q3) | 50.0 (25.0–50.0)                                               | 50.0 (25.0–75.0)                                      |                                        |
| <b>Food temptations</b>                                   | n (missing)    | 24 (13)                                                        | 61 (6)                                                | 0.5256                                 |
|                                                           | Median (Q1–Q3) | 37.5 (25.0–50.0)                                               | 50.0 (12.5–50.0)                                      |                                        |
| <b>Adherence to dietary protein restriction</b>           | n (missing)    | 21 (16)                                                        | 59 (8)                                                | 0.1498                                 |
|                                                           | Median (Q1–Q3) | 15.0 (0.0–25.0)                                                | 20.0 (0.0–37.5)                                       |                                        |
| <b>Social impact of dietary protein restriction</b>       | n (missing)    | 24 (13)                                                        | 61 (6)                                                | 0.3600                                 |
|                                                           | Median (Q1–Q3) | 9.2 (0.0–29.6)                                                 | 12.5 (8.3–20.8)                                       |                                        |

|                                                                 |                | Severity of PKU                                                |                                                       |                                        |
|-----------------------------------------------------------------|----------------|----------------------------------------------------------------|-------------------------------------------------------|----------------------------------------|
|                                                                 |                | Mild-moderate PKU<br>(Phe level: 600-1200<br>μmol/L)<br>(n=37) | Classic PKU<br>(Phe level: >1200<br>μmol/L)<br>(n=67) | p-value<br>(Mann-Whitney<br>/Wilcoxon) |
| <b>Practical impact of dietary protein restriction</b>          | n (missing)    | 21 (16)                                                        | 52 (15)                                               | 0.9708                                 |
|                                                                 | Median (Q1–Q3) | 32.1 (20.8–46.4)                                               | 35.7 (19.6–51.8)                                      |                                        |
| <b>Overall impact of dietary protein restriction</b>            | n (missing)    | 22 (15)                                                        | 55 (12)                                               | 0.9865                                 |
|                                                                 | Median (Q1–Q3) | 26.1 (11.5–34.1)                                               | 25.0 (11.4–38.5)                                      |                                        |
| <b>Taste – low-protein food</b>                                 | n (missing)    | 16 (21)                                                        | 53 (14)                                               | 0.4093                                 |
|                                                                 | Median (Q1–Q3) | 25.0 (25.0–50.0)                                               | 25.0 (25.0–50.0)                                      |                                        |
| <b>Food enjoyment</b>                                           | n (missing)    | 24 (13)                                                        | 60 (7)                                                | 0.4831                                 |
|                                                                 | Median (Q1–Q3) | 25.0 (0.0–25.0)                                                | 25.0 (0.0–50.0)                                       |                                        |
| <b>Guilt if dietary protein restriction not followed</b>        | n (missing)    | 23 (14)                                                        | 61 (6)                                                | 0.7968                                 |
|                                                                 | Median (Q1–Q3) | 50.0 (25.0–75.0)                                               | 50.0 (25.0–75.0)                                      |                                        |
| <b>Overall difficulty following dietary protein restriction</b> | n (missing)    | 24 (13)                                                        | 61 (6)                                                | 0.7708                                 |
|                                                                 | Median (Q1–Q3) | 25.0 (0.0–50.0)                                                | 25.0 (0.0–50.0)                                       |                                        |

Phe: phenylalanine; PKU: phenylketonuria; Q: quartile; QOL: quality of life.
